# Supplementary material for: Supplementation with Bifidobacterium longum subspecies infantis EVC001 for mitigation of type 1 diabetes autoimmunity: the GPPAD-SINT1A randomised controlled trial protocol
Source: PubMed Central journal article supplement — BMJ Open. 2021 Nov 9;11(11):e052449. doi: 10.1136/bmjopen-2021-052449 (PMC8578987; doi:10.1136/bmjopen-2021-052449), 2021-11-09
Supplement: bmjopen-2021-052449.draft_revisions.pdf [file bmjopen-2021-052449.draft_revisions.pdf]

# BMJ Open

BMJ Open is committed to open peer review. As part of this commitment we make the peer review history of every article we publish publicly available.

When an article is published we post the peer reviewers' comments and the authors' responses online. We also post the versions of the paper that were used during peer review. These are the versions that the peer review comments apply to.

The versions of the paper that follow are the versions that were submitted during the peer review process. They are not the versions of record or the final published versions. They should not be cited or distributed as the published version of this manuscript.

BMJ Open is an open access journal and the full, final, typeset and author-corrected version of record of the manuscript is available on our site with no access controls, subscription charges or pay-per-view fees (<http://bmjopen.bmj.com>).

If you have any questions on BMJ Open's open peer review process please email [info.bmjopen@bmj.com](mailto:info.bmjopen@bmj.com)

# BMJ Open

## Supplementation with *Bifidobacteria longum* subspecies *infantis* EVC001 for mitigation of type 1 diabetes autoimmunity - The GPPAD-SINT1A Study Protocol

|                               |                                                                                                                                                                                                                                                                                                                                                                                                                                                                                                                                                                                                                                                                                                                                                                                                                                                                                                                                                                                                                                                                                                                                                                                                                                                                                                                                                                                                                                                                                                                                                                                                                                                                                                                                                                                                                                                                                                                                                                                                                                                                                                                                                                                                                                                                                                 |
|-------------------------------|-------------------------------------------------------------------------------------------------------------------------------------------------------------------------------------------------------------------------------------------------------------------------------------------------------------------------------------------------------------------------------------------------------------------------------------------------------------------------------------------------------------------------------------------------------------------------------------------------------------------------------------------------------------------------------------------------------------------------------------------------------------------------------------------------------------------------------------------------------------------------------------------------------------------------------------------------------------------------------------------------------------------------------------------------------------------------------------------------------------------------------------------------------------------------------------------------------------------------------------------------------------------------------------------------------------------------------------------------------------------------------------------------------------------------------------------------------------------------------------------------------------------------------------------------------------------------------------------------------------------------------------------------------------------------------------------------------------------------------------------------------------------------------------------------------------------------------------------------------------------------------------------------------------------------------------------------------------------------------------------------------------------------------------------------------------------------------------------------------------------------------------------------------------------------------------------------------------------------------------------------------------------------------------------------|
| Journal:                      | <i>BMJ Open</i>                                                                                                                                                                                                                                                                                                                                                                                                                                                                                                                                                                                                                                                                                                                                                                                                                                                                                                                                                                                                                                                                                                                                                                                                                                                                                                                                                                                                                                                                                                                                                                                                                                                                                                                                                                                                                                                                                                                                                                                                                                                                                                                                                                                                                                                                                 |
| Manuscript ID                 | bmjopen-2021-052449                                                                                                                                                                                                                                                                                                                                                                                                                                                                                                                                                                                                                                                                                                                                                                                                                                                                                                                                                                                                                                                                                                                                                                                                                                                                                                                                                                                                                                                                                                                                                                                                                                                                                                                                                                                                                                                                                                                                                                                                                                                                                                                                                                                                                                                                             |
| Article Type:                 | Protocol                                                                                                                                                                                                                                                                                                                                                                                                                                                                                                                                                                                                                                                                                                                                                                                                                                                                                                                                                                                                                                                                                                                                                                                                                                                                                                                                                                                                                                                                                                                                                                                                                                                                                                                                                                                                                                                                                                                                                                                                                                                                                                                                                                                                                                                                                        |
| Date Submitted by the Author: | 19-Apr-2021                                                                                                                                                                                                                                                                                                                                                                                                                                                                                                                                                                                                                                                                                                                                                                                                                                                                                                                                                                                                                                                                                                                                                                                                                                                                                                                                                                                                                                                                                                                                                                                                                                                                                                                                                                                                                                                                                                                                                                                                                                                                                                                                                                                                                                                                                     |
| Complete List of Authors:     | <p>Ziegler, Anette; Helmholtz Zentrum Munchen Deutsches Forschungszentrum fur Umwelt und Gesundheit, Institute of Diabetes Research; Klinikum rechts der Isar der Technischen Universitat Munchen, Forschergruppe Diabetes</p> <p>Arnolds, Stefanie; Helmholtz Zentrum Munchen Deutsches Forschungszentrum fur Umwelt und Gesundheit, Institute of Diabetes Research</p> <p>Kölln, Annika; Helmholtz Zentrum Munchen Deutsches Forschungszentrum fur Umwelt und Gesundheit, Institute of Diabetes Research</p> <p>Achenbach, Peter; Helmholtz Zentrum Munchen Deutsches Forschungszentrum fur Umwelt und Gesundheit, Institute of Diabetes Research; Klinikum rechts der Isar der Technischen Universitat Munchen, Forschergruppe Diabetes</p> <p>Berner, Reinhard; Universitätsklinikum Carl Gustav Carus, Klinik und Poliklinik für Kinder- und Jugendmedizin</p> <p>Bonifacio, Ezio; Zentrum für Regenerative Therapien Dresden</p> <p>Casteels, Kristina; Universitair Ziekenhuis Leuven Context, Department of Pediatrics; KU Leuven Department of Development and Regeneration</p> <p>Elding Larsson, Helena; Lunds Universitet, Unit for Pediatric Endocrinology, Department of Clinical Sciences Malmö; Skåne University Hospital Lund, Department of Paediatrics</p> <p>Gündert, Melanie; Helmholtz Zentrum Munchen Deutsches Forschungszentrum fur Umwelt und Gesundheit, Institute of Diabetes Research</p> <p>Hasford, Joerg; Ludwig-Maximilians-Universität München, Institut für Med. Informationsverarbeitung, Biometrie und Epidemiologie</p> <p>Kordonouri, Olga; Hannoversche Kinderheilstätte, Allgemeine Kinderheilkunde</p> <p>Lundgren, Markus; Lunds Universitet, Unit for Pediatric Endocrinology, Department of Clinical Sciences Malmö</p> <p>Oltarzewski, Mariusz; Institute of Mother and Child</p> <p>Pekalski, Marcin; Wellcome Trust Centre for Human Genetics, Nuffield Department of Medicine, NIHR Biomedical Research Centre</p> <p>Pfirrmann, Markus; Ludwig Maximilians Universität München Institut für medizinische Informationsverarbeitung Biometrie und Epidemiologie, Biometrie und Epidemiologie</p> <p>Snape, Matthew; University of Oxford, Department of Paediatrics; Oxford University Hospitals NHS Trust, NIHR Oxford Biomedical Research</p> |

1  
2  
3  
4  
5  
6  
7  
8  
9  
10  
11  
12  
13  
14  
15  
16  
17  
18  
19  
20  
21  
22  
23  
24  
25  
26  
27  
28  
29  
30  
31  
32  
33  
34  
35  
36  
37  
38  
39  
40  
41  
42  
43  
44  
45  
46  
47  
48  
49  
50  
51  
52  
53  
54  
55  
56  
57  
58  
59  
60

|           |                                                                                                                                                                                                                        |
|-----------|------------------------------------------------------------------------------------------------------------------------------------------------------------------------------------------------------------------------|
|           | Centre<br>Szypowska, Agnieszka; Medical University of Warsaw, Department of Paediatrics<br>Todd, John; University of Oxford, Wellcome Centre for Human Genetics, Nuffield Department of Medicine<br>Study group, GPPAD |
| Keywords: | General diabetes < DIABETES & ENDOCRINOLOGY, IMMUNOLOGY, Diabetes & endocrinology < INTERNAL MEDICINE                                                                                                                  |
|           |                                                                                                                                                                                                                        |

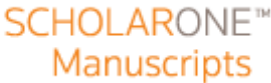

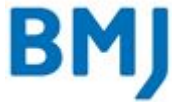

I, the Submitting Author has the right to grant and does grant on behalf of all authors of the Work (as defined in the below author licence), an exclusive licence and/or a non-exclusive licence for contributions from authors who are: i) UK Crown employees; ii) where BMJ has agreed a CC-BY licence shall apply, and/or iii) in accordance with the terms applicable for US Federal Government officers or employees acting as part of their official duties; on a worldwide, perpetual, irrevocable, royalty-free basis to BMJ Publishing Group Ltd ("BMJ") its licensees and where the relevant Journal is co-owned by BMJ to the co-owners of the Journal, to publish the Work in this journal and any other BMJ products and to exploit all rights, as set out in our [licence](#).

The Submitting Author accepts and understands that any supply made under these terms is made by BMJ to the Submitting Author unless you are acting as an employee on behalf of your employer or a postgraduate student of an affiliated institution which is paying any applicable article publishing charge ("APC") for Open Access articles. Where the Submitting Author wishes to make the Work available on an Open Access basis (and intends to pay the relevant APC), the terms of reuse of such Open Access shall be governed by a Creative Commons licence – details of these licences and which [Creative Commons](#) licence will apply to this Work are set out in our licence referred to above.

Other than as permitted in any relevant BMJ Author's Self Archiving Policies, I confirm this Work has not been accepted for publication elsewhere, is not being considered for publication elsewhere and does not duplicate material already published. I confirm all authors consent to publication of this Work and authorise the granting of this licence.

# Supplementation with *Bifidobacteria longum* subspecies *infantis* EVC001 for mitigation of type 1 diabetes autoimmunity - The GPPAD-SINT1A Study Protocol

Anette-Gabriele Ziegler<sup>1,2</sup>, Stefanie Arnolds<sup>1</sup>, Annika Kölln<sup>1</sup>, Peter Achenbach<sup>1,2</sup>, Reinhard Berner<sup>3</sup>, Ezio Bonifacio<sup>4</sup>, Kristina Casteels<sup>5,6</sup>, Helena Elding Larsson<sup>7,8</sup>, Melanie Gündert<sup>1</sup>, Joerg Hasford<sup>9</sup>, Olga Kordonouri<sup>10</sup>, Markus Lundgren<sup>7</sup>, Mariusz Oltarzewski<sup>11</sup>, Marcin L. Pekalski<sup>12</sup>, Markus Pfirrmann<sup>9</sup>, Matthew D. Snape<sup>13,14</sup>, Agnieszka Szypowska<sup>15</sup>, John A. Todd<sup>12</sup> and the GPPAD Study group

1 Institute of Diabetes Research, Helmholtz Zentrum München, Neuherberg, Germany

2 Forschergruppe Diabetes, Klinikum rechts der Isar, Technische Universität München, Medical faculty, Munich, Germany

3 Department of Pediatrics, University Hospital Carl Gustav Carus, Technische Universität Dresden, Dresden, Germany

4 Center for Regenerative Therapies Dresden (CRTD), Faculty of Medicine, Technische Universität Dresden, Dresden, Germany.

5 Department of Pediatrics, University Hospitals Leuven, Leuven, Belgium

6 Department of Development and Regeneration, KU Leuven, Leuven, Belgium

7 Unit for Pediatric Endocrinology, Department of Clinical Sciences Malmö, Lund University, Sweden

8 Department of Paediatrics, Skåne University Hospital, Malmö, Sweden

9 Institut für Medizinische Informationsverarbeitung, Biometrie und Epidemiologie, Ludwig-Maximilians-Universität München, Munich, Germany

10 Kinder- und Jugendkrankenhaus AUF DER BULT, Hannover, Germany

11 Institute of Mother and Child, Warsaw, Poland

12 Wellcome Centre for Human Genetics, Nuffield Department of Medicine, NIHR Biomedical Research Centre, University of Oxford, Oxford, UK

13 Department of Paediatrics, University of Oxford, Oxford, UK

14 NIHR Oxford Biomedical Research Centre, Oxford University Hospitals NHS Trust, Oxford, UK

15 Department of Paediatrics, Medical University of Warsaw, Warsaw, Poland

Corresponding author: Anette Gabriele Ziegler, Institute of Diabetes Research, Helmholtz Zentrum München and Forschergruppe Diabetes, Klinikum rechts der Isar, Technische Universität München, Neuherberg, Germany

email: anette-g.ziegler@helmholtz-muenchen.de, Tel.: 0049-89-3187-2896

**Word count:** 4672

**Keywords:** type 1 diabetes, islet autoantibody, probiotic *Bifidobacteria longum* subspecies *infantis* EVC001, GPPAD, SINT1A, prevention trial

## **Timeline of the study:**

Recruitment: 3.0 years

Start (FPFV): April 2021

Intervention: *B. infantis* EVC001

Intervention period: Until age 12 months

1  
2  
3 Follow-up after intervention: 2.5-5.5 years

4 Intended End (LPLV): October 2027

5 Protocol: V 1.0 November 09<sup>th</sup>, 2020  
6  
7  
8

9 **Abbreviations:**

|                       |                                                                                        |
|-----------------------|----------------------------------------------------------------------------------------|
| 10 AE                 | Adverse Events                                                                         |
| 11                    |                                                                                        |
| 12                    |                                                                                        |
| 13 ADA                | American Diabetes Association                                                          |
| 14                    |                                                                                        |
| 15 <i>B. infantis</i> | <i>Bifidobacterium longum</i> subspecies <i>infantis</i> EVC001                        |
| 16                    |                                                                                        |
| 17 CC                 | Coordinating Centre                                                                    |
| 18                    |                                                                                        |
| 19 CFU                | Colony Forming Units                                                                   |
| 20                    |                                                                                        |
| 21 CI                 | Confidence Interval                                                                    |
| 22                    |                                                                                        |
| 23 DSMB               | Data Safety Monitoring Board                                                           |
| 24                    |                                                                                        |
| 25 eCRF               | electronic Case Report Form                                                            |
| 26                    |                                                                                        |
| 27 FPG                | Fasting Plasma Glucose                                                                 |
| 28                    |                                                                                        |
| 29 GRS                | Genetic risk score                                                                     |
| 30                    |                                                                                        |
| 31 GPPAD              | Global Platform for the Prevention of Autoimmune Diabetes                              |
| 32                    |                                                                                        |
| 33 HLA                | Human Leukocyte Antigen                                                                |
| 34                    |                                                                                        |
| 35 OGTT               | Oral glucose tolerance test                                                            |
| 36                    |                                                                                        |
| 37 POInT              | Primary Oral Insulin Trial                                                             |
| 38                    |                                                                                        |
| 39 SAE                | Serious Adverse Events                                                                 |
| 40                    |                                                                                        |
| 41 SCFAs              | short chain fatty acids                                                                |
| 42                    |                                                                                        |
| 43 SINT1A             | Supplementation with <i>B. infantis</i> for mitigation of type 1 diabetes autoimmunity |
| 44                    |                                                                                        |
| 45 SNP                | Single nucleotide polymorphism                                                         |
| 46                    |                                                                                        |
| 47 T1D                | Type 1 diabetes                                                                        |
| 48                    |                                                                                        |
| 49                    |                                                                                        |
| 50                    |                                                                                        |
| 51                    |                                                                                        |
| 52                    |                                                                                        |
| 53                    |                                                                                        |
| 54                    |                                                                                        |
| 55                    |                                                                                        |
| 56                    |                                                                                        |
| 57                    |                                                                                        |
| 58                    |                                                                                        |
| 59                    |                                                                                        |
| 60                    |                                                                                        |

## ABSTRACT

**Introduction:** The GPPAD-SINT1A Study is designed as a randomised, placebo-controlled, double blind, multicentre, multinational, primary prevention study aiming to assess whether daily administration of *B. infantis* from age 7 days to 6 weeks until age 12 months to children with elevated genetic risk for type 1 diabetes reduces the cumulative incidence of beta-cell autoantibodies in childhood.

**Methods and analysis:** Infants aged 7 days to 6 weeks from Germany, Poland, Belgium, UK and Sweden are eligible for study participation if they have a >10.0% expected risk for developing multiple beta-cell autoantibodies by age 6 years as determined by genetic risk score or family history and HLA genotype. Infants are randomized 1:1 to daily administration of *B. infantis* or placebo until age 12 months, and followed for a maximum of 5.5 years thereafter. The primary outcome is the development of persistent confirmed multiple beta-cell autoantibodies. Secondary outcomes are 1. Any persistent confirmed beta-cell autoantibody, defined as at least one confirmed autoantibody in two consecutive samples, including IAA, GADA, IA-2A or ZnT8A, 2. Diabetes, 3. Transglutaminase autoantibodies associated with celiac disease, 4. Respiratory infection rate in first year of life during supplementation, 5. Safety. Exploratory outcomes include allergy, antibody response to vaccines, alterations of the gut microbiome or blood metabolome, stool pH and calprotectin.

**Ethics and dissemination:** The study is approved by the ethical committees of all participating clinical sites. The results will be disseminated through peer-reviewed journals and conference presentations and will be openly shared after completion of the study.

**Registration:** [clincov id: NCT04769037](https://clinicaltrials.gov/ct2/show/study/NCT04769037)

### Strengths and limitations of this study

- This is the first adequately powered placebo controlled study to test the supplementation with *B. infantis* for mitigation of type 1 diabetes autoimmunity.
- Targets the immune system of the oral and gut mucosa which is considered important for preventing immune-mediated diseases such as type 1 diabetes.
- Includes other health outcomes such as celiac autoimmunity, respiratory infections, allergy, antibody response (IgG titres) to vaccines, alterations of the gut microbiome or blood metabolome, measurement of stool pH and calprotectin.
- The requirement to identify eligible at-risk infants by genetic screening does not allow the study to introduce *B. infantis* supplementation in the first days of life or during pregnancy, when it may be most beneficial for establishing and maintaining a healthy gut microbiome and immune status.
- There could be advantages in using multiple probiotic strains with complementary metabolic capacities.

- 1  
2  
3  
4  
5  
6  
7  
8  
9  
10  
11  
12  
13  
14  
15  
16  
17  
18  
19  
20  
21  
22  
23  
24  
25  
26  
27  
28  
29  
30  
31  
32  
33  
34  
35  
36  
37  
38  
39  
40  
41  
42  
43  
44  
45  
46  
47  
48  
49  
50  
51  
52  
53  
54  
55  
56  
57  
58  
59  
60
- It may have been advantageous to add a prebiotic to the *B. infantis* formulation to compensate for the possibility that some mothers could stop breast feeding early into the trial, thereby reducing the availability of the oligosaccharides in breast milk that *B. infantis* metabolises for its health benefits.

For peer review only



## INTRODUCTION

Type 1 diabetes (T1D) results from an immune-mediated destruction of the pancreatic islet beta-cells resulting in insulin deficiency. This process is clinically silent and can be identified by circulating autoantibodies to beta-cell antigens (glutamic acid decarboxylase (GADA), islet tyrosine phosphatase 2 (IA-2A), insulin (IAA) and zinc transporter 8 (ZnT8A) (1). Beta-cell autoantibodies occur early in life with a peak incidence period between age 9 months and 3 years (2, 3, 4), and the risk to develop multiple beta-cell autoantibodies exponentially declines with age (5, 6). On the basis of these findings, it is concluded that any interventional therapy given as a primary prevention strategy must be started early in life.

This randomised, placebo-controlled study will evaluate whether supplementation with a daily dose of a probiotic in the first year of life can reduce the risk of developing beta-cell autoimmunity in children identified by the Global Platform for the Prevention of Autoimmune Diabetes (GPPAD) as being genetically at risk for developing T1D (previously described in detail in 7 and 8). The rationale for this study combines the most recent findings concerning the specific role that the commensal bacteria, microbiota, and their genes, the microbiome, could play in the induction of peripheral tolerance to insulin (9, 10, 11, 12), and builds on knowledge of the reported health and clinical benefits of early probiotic supplementation in peanut allergy prevention (13) and in lowering mortality owing to sepsis in children (14). Although it is widely accepted that the induction of the state of tolerance to beneficial bacteria during early life is critical for a newborn's survival, the clinical benefit for the prevention of immune-related diseases is only now being explored. It is believed that tolerance is achieved when the innate and adaptive immune cells promote tolerogenic immune responses to dietary and commensal antigens as well as reactions to a variety of beneficial metabolites produced by commensal microbes, in particular the short chain fatty acids (SCFAs) (15, 16, 17, 18, 19). The SINT1A study follows the ongoing Primary Oral Insulin Trial (POInT) (8), which administers insulin orally to train and sensitize the immune system at an early stage via gut exposure so that autoimmunity against insulin does not occur.

### **Evidence for dysbiosis in children prior to the development of type 1 diabetes**

Evidence that microbiome changes may alter the risk for T1D is presented by a number of prospective studies which have shown that changes in the microbiome precede the development of beta-cell autoimmunity and T1D. These include the BABYDIET study where alterations in microbial interaction networks were observed at age 0.5 and 2 years in children who developed beta-cell autoimmunity (9), and studies from Finland where higher abundances of *Bacteroides dorei* (20) and a decrease in microbial diversity were described in children with genetic predisposition to T1D (21). The TEDDY study

1  
2  
3 confirmed these alterations and found that the microbiome of children who did not develop beta-cell  
4 autoimmunity contained more genes that were related to fermentation and the biosynthesis of short-chain  
5 fatty acids (SCFA) supporting the protective effects of SCFA in early-onset human T1D (10).  
6  
7 Furthermore, the TEDDY study has reported that probiotic supplementation in the first 27 days of life,  
8 and only in this early period (documented by questionnaires and diary records) was associated with a  
9 decreased risk of beta-cell autoimmunity providing the first evidence that correcting dysbiosis in infants  
10 may be beneficial for children at risk of T1D (11). A recent finding links microbial metabolism to insulin-  
11 specific immune responses: the microbial enzymes belonging to the transketolase superfamily contain the  
12 primary insulin autoantigenic epitope (INS B:9-25). The microbial transketolase upregulation reflects the  
13 adaptation of the microbiome to digest sugar polymers during weaning and matches the time of  
14 autoantibody appearance against insulin. It has been suggested that an immune response to insulin  
15 mimotopes due to commensal dysbiosis is a possible primary cause of T1D (12).  
16  
17 Altogether, these results suggest that correcting dysbiosis in early life could help to promote immune  
18 tolerance and thus inhibit the initiation of beta-cell autoimmunity.  
19  
20  
21  
22  
23  
24  
25  
26

### 27 **Previous clinical studies using *B. infantis* in children**

28 A substantial body of evidence has connected gut inflammation with improper immune programming and  
29 the subsequent development of autoimmune conditions including T1D, atopic dermatitis, food allergies  
30 and asthma (19, 22). Bifidobacteria and in particular *Bifidobacterium longum* subspecies *infantis* (*B.*  
31 *infantis*) have positive properties that potentially counteract the development of gut inflammation in the  
32 first few months of life (23, 24). Depleted numbers of *Bifidobacteria* are associated with immune-related  
33 diseases such as allergy (25, 26). *Bacteroides* species, which are naturally outcompeted by *Bifidobacteria*,  
34 are present at higher numbers within the microbiota of children with high susceptibility to autoimmunity  
35 (19). There is additional evidence that Bifidobacterium abundance in early infancy increases protective  
36 efficacy of vaccines by enhancing immunologic memory (27). Lactic acid bacteria and bifidobacteria are  
37 increasingly administered to pregnant women and infants with the intention of improving health. A  
38 number of clinical studies have been conducted to document the safety and health benefits of dietary  
39 supplementation with bacterial strains (probiotics). Previous clinical studies using *B. infantis* are  
40 summarized in **Table 1**.  
41  
42  
43  
44  
45  
46  
47  
48  
49  
50  
51  
52  
53  
54  
55  
56  
57  
58  
59  
60

**Table 1:** Clinical studies on *B. infantis*

| Reference | Number of participants* | Main results                                                                                                                                                    |
|-----------|-------------------------|-----------------------------------------------------------------------------------------------------------------------------------------------------------------|
| (28)      | 80                      | Safe consumption and good tolerance of <i>B. infantis</i> ; stools significantly fewer and better formed                                                        |
| (29)      | 66                      | Significant changes to faecal microbiome composition; colonization with <i>B. infantis</i> ; higher abundance of faecal short chain fatty acids; lower stool pH |
| (30)      | 40                      | Lower fecal calprotectin levels; lower enteric inflammation                                                                                                     |

\* participants in total, meaning the group of children *B. infantis* fed and the group placebo fed (for all: treatment from day 7 on, dose  $1.8-2.8 \times 10^{10}$  CFU (colony forming units)), all participants were breast-fed infants

These studies show first evidence that supplementation with *B. infantis* is safe (28, 29, 30). The IMPRINT study demonstrates that supplementation with *B. infantis* ( $1.8-2.8 \times 10^{10}$  CFU) for 14 days (from day 7 to day 21) is well tolerated (28). Stools are fewer and better formed in infants in the supplementation group compared to the non-supplemented group. A follow-up study indicates that supplementation results in significant changes of the faecal microbiome composition (29) including evidence of persistent colonization of the probiotic organism. Infants colonized by Bifidobacteriaceae have 4-fold-lower faecal endotoxin levels, consistent with observed lower levels of Gram-negative Proteobacteria and Bacteroidetes, lower stool pH, and higher faecal concentrations of short chain fatty acids (29). In addition, pro-inflammatory cytokines are significantly lower in *B. infantis*-fed infants (30). The mentioned results suggest that correcting dysbiosis in early life could help to promote immune tolerance and thus inhibit the initiation of beta-cell autoimmunity. In this context, a supplementation with *B. infantis* seems promising.

### Primary Objective

To determine whether daily administration of *B. infantis* from age 7 days to 6 weeks until age 12 months to children with elevated genetic risk for T1D reduces the cumulative incidence of beta-cell autoantibodies in childhood.

## METHODS

### Outcome measures

#### Primary outcome

The primary outcome of SINT1A is the elapsed time from random treatment assignment to the development of persistent confirmed multiple beta-cell autoantibodies. For subjects who developed persistent confirmed multiple beta-cell autoantibodies, the elapsed time will be from the random treatment

1  
2  
3 assignment to the first confirmed autoantibody positive sample used in defining the persistent confirmed  
4 multiple beta-cell autoantibody positive status. It is expected that beta-cell autoantibodies will be detected  
5 prior to T1D diagnosis; however, the presence of diabetes in the absence of multiple beta-cell  
6 autoantibodies is also considered as a primary outcome endpoint, and in this case, the date of diagnosis is  
7 the time of the end point.  
8  
9

10  
11 The study primary outcome is realized with either persistent confirmed multiple beta-cell autoantibodies  
12 or Oral Glucose Tolerance Test (OGTT) criteria for diabetes or clinical criteria for diabetes.  
13

#### 14 **Criteria for persistent confirmed beta-cell autoantibodies**

15  
16 Criteria are based on the measurement of beta-cell autoantibodies against insulin (IAA), GAD65  
17 (GADA), IA-2 (IA-2A), and ZnT8 (ZnT8A) tested in the GPPAD central autoantibody laboratory and, if  
18 positive, confirmed in the GPPAD confirmatory laboratory.  
19

20 Confirmed IAA is defined as sample positive for IAA in both the GPPAD central and confirmatory  
21 laboratories. Confirmed GADA is defined as sample positive for GADA in both the GPPAD central and  
22 confirmatory laboratories. Confirmed IA-2A is defined as sample positive for IA-2A in both the GPPAD  
23 central and confirmatory laboratories. Confirmed ZnT8A is defined as sample positive for ZnT8RA or  
24 ZnT8WA in both the GPPAD central and confirmatory laboratories.  
25  
26

27  
28 The status persistent confirmed beta-cell autoantibody-positive is defined as confirmed IAA, confirmed  
29 GADA, confirmed IA-2A, or confirmed ZnT8A in two consecutive samples. Persistent confirmed  
30 multiple beta-cell autoantibodies (primary outcome) is defined as confirmed IAA, confirmed GADA,  
31 confirmed IA-2A, or confirmed ZnT8A in two consecutive samples, AND a confirmed second antibody  
32 from these four antibodies in one sample. Persistent confirmed beta-cell autoantibodies that are  
33 considered maternally derived are NOT included as positive for the primary outcome.  
34  
35  
36  
37

#### 38 **Criteria for T1D diagnosis**

39  
40 Diabetes may be diagnosed in a small number of children before a persistent confirmed multiple islet  
41 autoantibody positive status is achieved as the multiple autoantibody outcome requires two consecutive  
42 positive samples. In these cases, the primary outcome status is assigned to the child.  
43

44 Criteria for T1D diagnosis are, as defined by the American Diabetes Association (ADA), based on  
45 glucose testing, or the presence of unequivocal hyperglycaemia with acute metabolic decompensation  
46 (diabetic ketoacidosis). One of the following criteria must be met on two occasions as soon as possible  
47 but no less than 1 day apart for diabetes to be defined:  
48  
49

50  
51 1. Symptoms of diabetes and a casual plasma glucose  $\geq 200$  mg/dL (11.1mmol/L).

52 Casual is defined as any time of day without regard to time since last meal. The classic symptoms of  
53 diabetes include polyuria, polydipsia, and unexplained weight loss.  
54

55  
56 OR  
57  
58  
59  
60

1  
2  
3 2. Fasting plasma glucose (FPG)  $\geq 126$  mg/dL (7 mmol/L). Fasting is defined as no caloric intake for at  
4 least 8 hours.

5  
6 OR

7  
8 3. Two-hour plasma glucose (PG)  $\geq 200$  mg/dL (11.1 mmol/L) during an OGTT. The test should be  
9 performed using a glucose load containing the equivalent of 1.75g/kg body weight to a maximum of 75g  
10 anhydrous glucose dissolved in water. It is preferred that at least one of the two testing occasions involve  
11 an OGTT.

12  
13  
14 Cases diagnosed with T1D will be adjudicated by the Endpoint Committee. Study participation will be  
15 terminated if T1D is reached.

### 16 17 **Secondary outcomes**

18  
19 Secondary outcomes of the study are: 1. The development of any persistent confirmed beta-cell  
20 autoantibody, defined as at least one confirmed autoantibody in two consecutive samples, including IAA,  
21 GADA, IA-2A or ZnT8A, 2. Diabetes, 3. The development of persistent confirmed transglutaminase  
22 antibodies associated with celiac disease, defined as confirmed autoantibody in two consecutive samples,  
23 4. Respiratory infection rate in first year of life during supplementation and 5. Safety.

### 24 25 **Exploratory outcomes**

26  
27 The following exploratory outcomes may be assessed or in part assessed on a portion of the participants.  
28 They may not necessarily be included in the primary outcome analysis and publication: 1. Allergy, 2.  
29 Antibody response (IgG titres) to vaccines, 3. Alterations of the stool microbiome or 4. Blood  
30 metabolome, 5. Stool pH and 6. Stool calprotectin concentration.

### 31 32 **Study design and organisation**

33  
34  
35  
36  
37  
38 SINT1A will be conducted as an investigator-initiated, randomized, placebo-controlled, double-blind  
39 multi-center intervention study through GPPAD, a network of collaborating clinical study centres from  
40 European countries with sites in Belgium (Leuven), Germany (Dresden, Hannover, Munich), Poland  
41 (Warsaw), Sweden (Malmö), and UK (Newcastle, Cambridge). The Trial Coordinating Centre (GPPAD  
42 CC) is located at the Institute of Diabetes Research, Helmholtz Zentrum München. It manages  
43 coordination and communication between the SINT1A clinical study sites, and oversees the collection,  
44 analysis and storage of clinical data; also the supervision of regulatory activities, clinical research  
45 organization activities, the manufacturer of the active supplement, and the central laboratories is provided  
46 by the CC.

47  
48  
49  
50  
51  
52 GPPAD was founded in 2015 with the aim to provide an international infrastructure to enable T1D  
53 primary prevention trials, identify infants with an elevated genetic risk of developing T1D and offer  
54 participation in randomized controlled trials aiming to reduce the incidence of T1D in children (8, 31).

1  
2  
3 Until March 2021, more than 251,000 infants have been screened and had their genetic risk of developing  
4 T1D evaluated using a combination of family history and 47 single nucleotide polymorphisms (SNPs) (7).  
5 From these, over 2,000 infants have been identified as having a 10% probability or greater of developing  
6 multiple beta-cell autoantibodies by 6 years of age, making them eligible for GPPAD primary prevention  
7 trials (7). The first GPPAD trial POInT (Primary Oral Insulin Trial) has now (March/2021) completed  
8 enrollment (1,050 participants) (8). SINT1A will commence in April 2021 with the first patient first visit.  
9  
10  
11  
12  
13

### 14 **Study population**

15 Infants are tested for genetic risk of T1D based on advanced risk scores derived from 51 SNPs that define  
16 HLA-DR3, HLA-DR4, and HLA-DQ8 alleles as well as SNPs from HLA class I, and non-HLA T1D  
17 susceptibility genes, and from HLA class II protective alleles, as previously described (7, 32). Infants  
18 with a predicted risk of >10% to develop multiple beta-cell autoimmunity by age 6 years and who fulfil  
19 the inclusion criteria as stated below are eligible to participate in the GPPAD-SINT1A Study.  
20  
21  
22

23 A total of 1,144 infants will be enrolled and randomized 1:1 (*B. infantis* or placebo) in the SINT1A study  
24 (see **Figure 1**). Children with T1D susceptible genotypes also have a marked risk of around 10% for  
25 autoimmunity found in celiac disease as shown in the TEDDY study (33).  
26  
27  
28  
29

### 30 **Inclusion and exclusion criteria**

31 Participants must meet all entry criteria for the protocol as outlined below.  
32

- 33 • Infants between the ages of 7 days and 6 weeks (+14 days in case of illness or COVID-19 related  
34 issues or unexpected delay in result reporting) at the time of randomisation.
- 35 • A 10% or higher genetic risk to develop multiple beta-cell autoantibodies by age 6 years:  
36  
37     a. For infants without a first-degree family history of T1D, high genetic risk is defined as a  
38 DR3/DR4-DQ8 or DR4-DQ8/DR4-DQ8 genotype and a genetic risk score that is in the  
39 upper 25th centile (>14.4) (34) or a DR3/DR4-DQ8 genotype with a GRS between the  
40 upper 50th (14.0) and 25th centile and a GG genotype at the rs3763305 SNP. These  
41 represent around 1% of all newborns.  
42  
43     b. For infants with a first-degree family history of type 1 diabetes, high genetic risk is  
44 defined as having HLA DR4 and DQ8, and none of the following protective alleles:  
45 DRB1\*1501, DQB1\*0503, DRB1\*1303. These represent around 30% of infants with a  
46 first-degree family history of T1D.  
47  
48
- 49 • Written informed consent signed by the custodial parent(s).  
50  
51  
52  
53  
54

55 Participants may not enter the study if ANY of the following apply:  
56  
57  
58  
59  
60

- Any medical condition, concomitant disease or treatment that may interfere with the assessments or may jeopardize the participant's safe participation in the study, as judged by the Investigators.
- Preterm delivery < 36 weeks of gestation.
- Proven immunodeficiency.
- Any condition that could be associated with poor compliance.
- Diagnosis of diabetes at the time of recruitment.

### **Informed Consent**

The GPPAD-SINT1A Study will be described to the custodial parent(s) of potential participants by qualified GPPAD study personnel. The custodial parent(s) will have the opportunity to read the consent document and to discuss any questions concerning the consent or study participation. The families will be given enough time to consider whether or not to participate. The custodial parent(s) will then be asked to sign and date an informed consent form prior to or at the baseline visit. Date and signature of the study Investigator (or other authorized study personnel, if applicable) will also be obtained on the consent form. A copy of the informed consent form will be handed out to the families. The custodial parent(s) of the prospective participant will be told that being in the study is voluntary and that the participant may withdraw from the study at any time, for any reason.

### **Patient and Public Involvement**

Patients were not involved in the study design but in the prioritization of the research question of T1D prevention. Patients support recruitment through dissemination, and participation in press conferences. Participating families will be informed about the outcome of the trial via webcast, letter, and personal communication upon the completion of the trial.

### **Randomisation**

Subjects will be centrally randomised in a 1:1 ratio to one of the two intervention arms at the baseline visit. Siblings within one household will be randomised to the same intervention arm to avoid mix-up of supplementation. Randomisation will be stratified for whether the child is still breast-fed at the date of randomization and study centre.

### Study timeline

The study is expected to take 6.5 years to complete. This includes an intervention phase of 12 months, and minimum 2.5 (last participant enrolled) to maximum 5.5 years of follow-up (first participant enrolled) after intervention (Figure 1). The enrolment period is projected to be 3.0 years.

### Study assessment

The baseline visit includes the collection of information on medical history, C-section, breast-feeding, proton pump inhibitor therapy, infections, probiotic use and antibiotic treatment prior to enrolment and the collection of a stool sample. Families will be instructed in the administration and storage of the blinded food product (*B. infantis* or placebo). Mothers will be encouraged to make their best effort to maintain breastfeeding for at least the first 3-4 months, and they will be encouraged to continue breastfeeding for as long as possible during the first year of the infant's life. Two more intervention visits (visit 2 and 3) are planned after 6 months and 12 months ( $\pm 14$  days). At these visits venous blood and a stool sample is collected, electronic questionnaires are discussed. The assessment of weight and height is performed at all visits. After the intervention period, study visit 4 will be conducted at age 2 years ( $\pm 30$  days), subsequent follow-up study visits will be conducted every year ( $\pm 30$  days) until the end of the study. A detailed table explaining study visits, and data and sample collection is shown in

**Supplementary File 1.** All study relevant subject data and laboratory results are documented in corresponding electronic Case Report Forms (eCRFs).

### E-diaries and Allergy questionnaires

Throughout the intervention period, parents will be asked to complete e-diaries fortnightly to collect information on breast-feeding, respiratory infections, antibiotic treatment and treatment with proton pump inhibitors. Additional questionnaires to obtain information about allergies will be collected every 12 months starting at age 12 months  $\pm 14$  days until the end of the study. The information given by the parents will be captured in a central database and reviewed and discussed during the study visits and phone calls between the visits.

### For participants who develop positive beta-cell or transglutaminase autoantibodies

Participants who have confirmed positive beta-cell- or transglutaminase autoantibodies during the study are asked to donate a confirmation sample within 4-12 weeks. If the participant has persistent confirmed beta-cell autoantibodies, the custodial parent(s) are informed and asked to participate in an educational program informing about the diagnosis of beta-cell autoantibody positivity and possible symptoms of hyperglycemia and metabolic decompensation. The child remains in the study and continues to be treated



1  
2  
3 or followed as planned until the child has developed T1D or end of study. Home monitoring of blood  
4 glucose will be recommended 2-monthly if a child is considered at risk for a rapid progression to diabetes  
5 (eg IA-2A positive, very high titers of antibodies, or impaired blood glucose values). In case of persistent  
6 confirmed positivity for transglutaminase autoantibodies, an intestinal biopsy maybe recommended to  
7 clarify the diagnosis of celiac disease. These children will continue to receive *B. infantis*/placebo and will  
8 be followed in the study for continued monitoring of diabetes development and safety assessments.  
9  
10  
11  
12  
13

### 14 **Intervention**

15 Participants are randomized in a 1:1 ratio to receive either *B. infantis* or placebo. Each dose of the active  
16 supplement is provided as one sachet with *B. infantis*,  $8 \times 10^9$  colony forming units (CFU) in lactose. The  
17 placebo consists of lactose, identical in appearance and taste to the active supplement.  
18

19 *B. infantis*/placebo will be administered orally, once a day, using single-dose sachets. The content  
20 (powder) of the sachets is poured into a small bowl and mixed with 3-5ml of breast milk, infant formula,  
21 or water. The solution will be administered using a feeding syringe, preferably in the morning. Parent(s)  
22 will be instructed in the administration and storage of the sachets (should be kept frozen until use) at or  
23 prior to their baseline visit. The genome of *B. infantis* is available in the NCBI accession number  
24 NZ\_LR655210 under the strain name USA001\_1 (35).  
25  
26  
27  
28  
29  
30

### 31 **Safety**

32 As the study intervention is not considered a medicinal product, safety reporting obligations as for IMP  
33 clinical trials do not apply. However, AEs and serious adverse events (SAEs) up to 30 days after the last  
34 administration of the food product are assessed and captured in the eCRF. Adverse events will be graded  
35 as mild, moderate, severe, life-threatening or death according to the National Cancer Institute's Common  
36 Terminology Criteria for Adverse Events (NCI-CTCAE) Version 5.0.  
37  
38  
39  
40

41 Physical examinations including measurement of height and weight are performed at all visits.  
42  
43

### 44 **ANALYSIS**

45 All efficacy analyses will be conducted under the Intention-To-Treat principle whereby all effectiveness  
46 outcome data in all randomised subjects who have received at least one dose of *B. infantis* supplement or  
47 placebo will be included in all analyses as appropriate. Subjects who drop-out of the study will not be  
48 replaced. All data acquired prior to termination will be included in the primary analysis unless a  
49 participant withdraws consent.  
50  
51  
52  
53  
54  
55  
56  
57  
58  
59  
60

### Primary outcome and analysis

The cumulative incidence of multiple beta-cell autoantibodies over time since randomization within each treatment group will be estimated from a Kaplan-Meier estimate of the "beta-cell autoantibody-free" survival function. The difference between groups in the cumulative incidence functions, and the associated hazard functions, will be tested at the 0.05 level, two-sided, using Cox regression including site as covariate. With respect to the primary outcome, the hazard ratio of *B. infantis* to placebo will be given together with its 95% confidence interval. The final alpha is 0.05 (two-sided). In case the assumptions of the sample size estimation hold, it will be possible to reject the null hypothesis of equal hazard rates with the power of 80%, if 914 children will be uniformly randomised over 3 years and afterwards, all 914 children will be followed for another 3.5 years (6.5 years total duration after first enrollment). We have assumed a drop-out rate of 20%, and therefore we need to randomise 1,144 children to support an 80% power by a complete follow-up of 914 children ranging from 3.5 to 6.5 years.

### Sub-group analyses of Primary Outcome

It is reasonable to consider that *B. infantis* colonization, breast-feeding status, and secretor (FUT2 gene) status may impact the outcome (36, 37). *B. infantis* colonization will be measured in stool samples collected at visit age 3 months. A multiple Cox regression analysis will be performed on the primary outcome including treatment group and colonization as a continuous variable. This will also be performed with a treatment group-colonization interaction term, and with colonization as a categorical variable. Three categories representing no colonization, low and high colonization based on the distribution of values in the children will be used. Breast-feeding will be encouraged. Nevertheless, a portion of the children will not be receiving breast milk when they start. Breast-feeding will, therefore, be included as a categorical variable together with treatment in a Cox regression. An interaction analysis between colonization and breast-feeding status will be performed, and a subgroup analysis for the primary outcome will be performed in children categorized by their FUT2 gene genotype as secretors and non-secretors. Additional variables that will be analysed by multivariable Cox regression include 1. Children categorized as having a mother with diabetes versus the remainder; 2. Children who have HLA DR3/4-DQ8 versus the remainder; 3. Children who have the T1D susceptible INS AA genotype versus the remainder; 4. Sex; 5. Caesarean section versus vaginal birth; 6. BMI at age 1 year as tertiles; 7. Genetic risk score tertiles.

### Secondary and exploratory outcomes and analyses

For the secondary outcomes, the treatment arms will be compared on the corresponding incidence rates of each secondary outcome using the log rank statistic. Other secondary outcomes will be analysed by

1  
2  
3 comparison between the *B. infantis* supplementation and placebo supplementation groups using  
4 appropriate statistics in dependence on the outcome of interest. Subgroup analyses analogous to those  
5 described for the beta-cell autoantibodies endpoint will be conducted on the secondary outcome  
6 endpoints. Exploratory analyses will examine the associations between *B. infantis* supplementation and  
7 allergy, mouth and stool organisms (microbiome), and blood markers such as the metabolome, lipidome,  
8 or inflammatory proteins and ancillary study measurements that specific sites may undertake.  
9  
10  
11  
12  
13

### 14 **Study power and accrual target**

15 For the sample size estimation, the following scenario was chosen:

- 16 • Overall alpha level = 0.05 (two-sided).
- 17 • Overall beta level = 0.2, i.e. power = 0.8.
- 18 • In the placebo group, at 3.5 years (approximate age of participants, 4 years), an event probability  
19 of 7.5% was assumed. Based on the exponential distribution, this leads to a hazard of 0.02227.
- 20 • For the active treatment, it is assumed that the hazard rate will be halved.
- 21 • Accrual time is 3 years.
- 22 • Follow-up time is 3.5 years.
- 23 • A dropout rate of 20% was taken into account.

24  
25  
26  
27  
28  
29  
30  
31 The study has been designed to provide 80% power to detect a 50% risk reduction in the hazard rate of  
32 the event of confirmed persistent beta-cell autoantibodies using a two-sided test at the significance level  
33 0.05 after 6.5 years of study duration. Decisive test will be the Wald test for the hazard ratio between the  
34 two groups within a Cox PH model. It is expected that the hazard is halved by active treatment.

35  
36  
37 According to the assumptions described in above scenario, n=914 patients should be randomised between  
38 the two groups. With an assumed drop-out rate of 20%, n=1,144 children will need to be randomised.  
39  
40  
41

### 42 **Benefits and Risks**

#### 43 **Benefits**

44  
45 The potential benefit for a participating child is the prevention (or delay in onset) of beta-cell  
46 autoantibodies and diabetes, celiac disease, childhood infections, and allergy. For all participating  
47 children, including children who receive placebo, testing blood samples will allow early recognition of  
48 pre-symptomatic T1D and celiac disease before the child shows the typical symptoms, and an appropriate  
49 therapy could be started immediately, potentially reducing complications later in life. Furthermore,  
50 information about other ongoing prevention trials or available treatments and intervention studies can be  
51 given to families.  
52  
53  
54  
55  
56  
57  
58  
59  
60

## Risks

So far, there have been no reports of risks and side effects associated with the use of *B. infantis*. Several studies show that various strains of *B. infantis* have been administered to numerous newborns and especially to premature babies without complications. In breastfed babies, *B. infantis* is one of the most common bacteria found in the intestine. Typical risks or complaints associated with taking a blood sample cannot be excluded. The volume of blood drawn for the trial endpoints is <1% of the total blood volume, within the suggested limits from the European guidelines for a paediatric population (38).

A data safety monitoring board (DSMB) is established. A DSMB is an independent group of experts responsible to safeguard the well-being and safety of the study participants. The DSMB will meet six-monthly during the intervention phase and 12-monthly during the follow-up phase. Before each DSMB meeting, the DSMB will receive a report with all relevant information on recruitment rate, data completeness and safety data, including beta-cell- and transglutaminase autoantibody and diabetes outcomes.

## ETHICS AND DISSEMINATION

### Ethics

The study was approved by the local ethical committees and regulatory authorities of the Technische Universität München, Medical Faculty (715/20 S), the Technische Universität Dresden SR+BO-44012021), the Medizinische Hochschule Hannover (9589\_BO\_S\_2021), the Medical University of Warsaw (KB/5/2021) and the Institute of Mother and Child in Warsaw, the UK Health Research Authority, EC Research UZ Leuven (322) and the Swedish ethical review authority (dnr 2021-01210).

### Dissemination

GPPAD is committed to sharing of data and biosamples in compliance with all applicable European and GPPAD Consortium Member State, Data Protection and Privacy Protection laws, rules and regulations. Pseudonymized data collected through clinical studies will be made available for scientific and/or medical research no later than twelve months after the completion and publication of the clinical study. GPPAD provides access to biobank material gathered from study participants to external investigators, respecting study participants' privacy rights.

## REFERENCES

1. Ziegler AG, Rewers M, Simell O et al. Seroconversion to Multiple Islet Autoantibodies and Risk of Progression to Diabetes in Children. *JAMA* 2013;.309(23):2473-9
2. Ziegler AG, Bonifacio E, BABYDIAB-BABYDIET Study Group. Age-related islet autoantibody incidence in offspring of patients with type 1 diabetes. *Diabetologia* 2012; 55(7):1937-43
3. Kimpimaki T, Kulmala P, Savola K et al. Natural history of beta-cell autoimmunity in young children with increased genetic susceptibility to type 1 diabetes recruited from the general population. *J Clin Endocrinol Metab* 2002; 87:4572-4579
4. Krischer JP, Lynch KF, Schatz DA et al., TEDDY Study Group. The 6 year incidence of diabetes-associated autoantibodies in genetically at-risk children: the TEDDY study. *Diabetologia* 2015; 58(5):980-7.
5. Hoffmann VS, Weiß A, Winkler C et al. Landmark models to define the age-adjusted risk of developing stage 1 type 1 diabetes across childhood and adolescence. *BMC Med.* 2019, 17 (125).
6. Bonifacio E, Weiß A, Winkler C et al. An Age-Related Exponential Decline in the Risk of Multiple Islet Autoantibody Seroconversion During Childhood. *Diabetes Care* 2021, dc202122.
7. Winkler C, Haupt F, Heigermoser M et al. Identification of infants with increased type 1 diabetes genetic risk for enrollment into Primary Prevention Trials—GPPAD-02 study design and first results. *Pediatr Diabetes* 2019; 20(6): 720–727.
8. Ziegler AG, Achenbach P, Berner R et al. Oral insulin therapy for primary prevention of type 1 diabetes in infants with high genetic risk: the GPPAD-POInT (global platform for the prevention of autoimmune diabetes primary oral insulin trial) study protocol. *BMJ Open.* 2019; 9(6): e028578.
9. Endesfelder D, Zu Castell W, Ardisson A, et al. (2014), Compromised gut microbiota networks in children with anti-islet cell autoimmunity. *Diabetes.* 63:2006–14
10. Vatanen T, Franzosa EA, Schwager R, et al. (2018), The human gut microbiome in early-onset type 1 diabetes from the TEDDY study. *Nature.* 562(7728):589-594
11. Uusitalo U, Liu X, Yang J, et al.; TEDDY Study Group. (2016), Association of Early Exposure of Probiotics and Islet Autoimmunity in the TEDDY Study. *JAMA Pediatr.* 170(1):20-8
12. Garcia AR, Paterou A, Lee M, et al. (2019), Peripheral tolerance to insulin is encoded by mimicry in the microbiome. <https://www.biorxiv.org/content/10.1101/2019.12.18.881433v1>
13. Hsiao KC, Ponsonby AL, Axelrad C, et al.; PPOIT Study Team (2017), Long-term clinical and immunological effects of probiotic and peanut oral immunotherapy after treatment cessation: 4-year follow-up of a randomised, double-blind, placebo-controlled trial. *Lancet Child Adolesc Health.* 1(2):97-105
14. Panigrahi P, Parida S, Nanda NC, et al. (2017), A randomized synbiotic trial to prevent sepsis among infants in rural India. *Nature.* 548(7668):407-412
15. Marino E, Richards JL, McLeod KH, et al. (2017), Gut microbial metabolites limit the frequency of autoimmune T cells and protect against type 1 diabetes. *Nat Immunol.* 18:552-562
16. Sommer F, Bäckhed F. (2013), The gut microbiota - masters of host development and physiology. *Nat Rev Microbiol.* 11(4):227-38
17. Stewart CJ, Ajami NJ, O'Brien JL, et al. (2018), Temporal development of the gut microbiome in early childhood from the TEDDY study. *Nature.* 562:583-588
18. Amenyogbe N, Kollmann TR, Ben-Othman R (2017), Early-Life Host-Microbiome Interphase: The Key Frontier for Immune Development. *Front Pediatr.* 5:111
19. Vatanen T, Kostic AD, d'Hennezel E, et al. (2016), Variation in Microbiome LPS Immunogenicity Contributes to Autoimmunity in Humans. *Cell.* 165:842-853
20. Davis-Richardson AG, Ardisson AN, Dias R, et al. (2014), *Bacteroides dorei* dominates gut microbiome prior to autoimmunity in Finnish children at high risk for type 1 diabetes. *Front Microbiol.* 10;5:678
21. Kostic AD, Gevers D, Siljander H, et al.; DIABIMMUNE Study Group, Xavier RJ. (2015), The dynamics of the human infant gut microbiome in development and in progression toward type 1 diabetes. *Cell Host Microbe.* 17(2):260-73
22. Russell JT, Roesch LFW, Ördberg M, et al. (2019), Genetic risk for autoimmunity is associated with distinct changes in the human gut microbiome. *Nat Commun.* 10(1):3621

23. Chichlowski M, Shah N, Wampler JL, et al. (2020), *Bifidobacterium longum* Subspecies *infantis* (*B. infantis*) in Pediatric Nutrition: Current State of Knowledge. *Nutrients*. 12(6):1581
24. Insel R, Knip M (2018), Prospects for primary prevention of type 1 diabetes by restoring a disappearing microbe. *Pediatr Diabetes*. 19(8):1400-1406
25. Ismail IH, Boyle RJ, Licciardi PV, et al. (2016), Early gut colonization by *Bifidobacterium breve* and *B. catenulatum* differentially modulates eczema risk in children at high risk of developing allergic disease. *Pediatr Allergy Immunol*. 27(8):838-846
26. van der Aa LB, van Aalderen WM, Heymans HS, et al.; Synbad Study Group. (2011), Synbiotics prevent asthma-like symptoms in infants with atopic dermatitis. *Allergy*. 66(2):170-7
27. Huda MN, Ahmad SM, Alam MJ, et al. (2019), *Bifidobacterium* Abundance in Early Infancy and Vaccine Response at 2 Years of Age. *Pediatrics*. 143(2):e20181489
28. Smilowitz J, Moya J, Breck M, et al. (2017), Safety and tolerability of *Bifidobacterium longum* subspecies *infantis* EVC001 supplementation in healthy term breastfed infants: A phase I clinical trial. *BMC Pediatrics*. 17
29. Frese SA, Hutton AA, Contreras LN, et al. (2017), Persistence of Supplemented *Bifidobacterium longum* subsp. *infantis* EVC001 in Breastfed Infants. *mSphere*. 2(6):e00501-17
30. Henrick BM, Chew S, Casaburi G, et al. (2019), Colonization by *B. infantis* EVC001 modulates enteric inflammation in exclusively breastfed infants. *Pediatr Res* 86, 749–757
31. Ziegler AG, Danne T, Dunger DB, et al. (2016). Primary prevention of beta-cell autoimmunity and type 1 diabetes – The Global Platform for the Prevention of Autoimmune Diabetes (GPPAD) perspectives. *Molecular Metabolism*; 5 (4), 255-262
32. Hippich M, Beyerlein A, Hagopian WA, et al. (2019), Genetic Contribution to the Divergence in Type 1 Diabetes Risk Between Children From the General Population and Children From Affected Families. *Diabetes*, 68(4): 847-857.
33. Liu E, Lee HS, Aronsson CA, et al.; TEDDY Study Group (2014), Risk of pediatric celiac disease according to HLA haplotype and country. *N Engl J Med*. 371(1):42-9
34. Bonifacio E, Beyerlein A, Hippich M et al. Genetic scores to stratify risk of developing multiple islet autoantibodies and type 1 diabetes: A prospective study in children. *PLoS Med* 2018; 15(4)
35. Duar RM, Casaburi G, Mitchell RD, et al. (2020), Comparative Genome Analysis of *Bifidobacterium longum* subsp. *infantis* Strains Reveals Variation in Human Milk Oligosaccharide Utilization Genes among Commercial Probiotics. *Nutrients*. 12, 3247
36. Smyth DJ, Cooper JD, Howson JM, Clarke P, Downes K, Mistry T, Stevens H, Walker NM, Todd JA. FUT2 nonsecretor status links type 1 diabetes susceptibility and resistance to infection. *Diabetes*. 2011 Nov;60(11):3081-4. doi: 10.2337/db11-0638.
37. Yang P, Li HL, Wang CY. FUT2 nonfunctional variant: a "missing link" between genes and environment in type 1 diabetes? *Diabetes*. 2011 Nov;60(11):2685-7. doi: 10.2337/db11-1104.
38. Online referencing [http://ec.europa.eu/health/sites/health/files/files/eudralex/vol-10/ethical\\_considerations\\_en.pdf](http://ec.europa.eu/health/sites/health/files/files/eudralex/vol-10/ethical_considerations_en.pdf) (2017, date accessed 12 June 2017)

## **GPPAD STUDY GROUP**

### **GPPAD-Coordinating Center (CC)**

Melanie Gündert, Florian Haupt, Stefanie Arnolds, Robin Assfalg, Corinna Barz, Karina Blasius, Nadine Friedl, Cigdem Gezginci, Adriano Gomez-Bantel, Joerg Hasford, Martin Heigermoser, Bianca Höfelschweiger, Manja Jolink, Nadine Klein, Ramona Lickert, Claudia Matzke, Rebecca Niewöhner, Marlon Scholz, Katharina Schütte-Borkovec, Mira Taulien, Lara Vogel, Franziska Voß, Andreas Weiß, José Maria Zapardiel Gonzalo, Philipp Siff, Heidi Kapfelsberger, Merve Vurucu, Katharina Sarcletti, Stefanie Jacobson, Yulia Grinin

**Protocol Committee:** John A. Todd, Anette-G. Ziegler (Chairs), Peter Achenbach, Stefanie Arnolds, Reinhard Berner, Ezio Bonifacio, Kristina Casteels, Markus Lundgren, Joerg Hasford, Olga Kordonouri, Marcin L. Pekalski, Matthew Snape, Agnieszka Szypowska

**Medical Monitor:** Katharina Warncke

**Eligibility Committee:** Ezio Bonifacio, Joerg Hasford, John A Todd

**Outcome Committee:** Peter Achenbach, Ezio Bonifacio

**Type 1 diabetes endpoint committee:** Helena Elding Larsson, Peter Achenbach, Olga Kordonouri, Ezio Bonifacio, Anette G. Ziegler

### **Belgium Clinical Center**

Kristina Casteels, Annre Rochtus, An Jacobs, Hilde Morobé, Jasmin Paulus, Bronté Vrancken, Natalie Van den Driessche, Renka Van Heyste, Janne Houben, Veerle Vanhuysse

### **Germany, Dresden Clinical Center**

Ezio Bonifacio, Reinhard Berner, Sevina Dietz, Gita Gemulla, Manja Gottschalk-Schwarz, Sophie Heinke, Angela Hommel, Susann Kowal, Fabian Lander, Robert Morgenstern, Marc Weigelt, Nicole Zubizarreta, Sari Arabi, Raphael Hoffmann, Ruth Blechschmidt, Franziska Ehrlich, Anja Löff

### **Germany, Hanover Clinical Center**

Olga Kordonouri, Thomas Danne, Laura Galuschka, Ute Holtkamp, Nils Janzen, Sarah Landsberg, Karin Lange, Erika Marquardt, Felix Reschke, Frank Roloff, Kerstin Semler, Thekla von dem Berge

### **Germany, Munich Clinical Center**

Anette G. Ziegler, Peter Achenbach, Melanie Bunk, Simone Färber-Meisterjahn, Willi Grätz, Ines Greif, Melanie Herbst, Anna Hofelich, Annika Kölln, Benjamin Marcus, Annette Munzinger, Jasmin Ohli, Claudia Ramminger, Franziska Reinmüller, Tiziana Welzhofer, Christiane Winkler

### **Poland Clinical Center**

Agnieszka Szypowska, Mariusz Ołtarzewski, Sylwia Dybkowska, Katarzyna Dzygało, Lidia Groele, Dorota Owczarek, Katarzyna Popko, Agnieszka Skrobot, Anna Taczanowska, Beata Zduńczyk

### **Sweden Clinical Center**

Helena Elding Larsson, Markus Lundgren, Åke Lernmark, Daniel Agardh, Carin Andrén Aronsson, Rasmus Bennet, Charlotte Brundin, Lina Fransson, Ida Jönsson, Sara Maroufkhani, Zeliha Mestan, Caroline Nilsson, Anita Ramelius, Evelyn Tekum Amboh, Carina Törn

### **UK, Cambridge Clinical Center**

Loredana Marcovecchio, Katarzyna Gajewska-Knapik, Sarah Hogg, Elena Romero, Suzannah Twiss

### **UK, Newcastle Clinical Center**

Catherine Owen, Helen Gallon, Laura Gebbie, Fiona Jenkinson, Steven Pratt, Steve Robson, Claire Simmister, Evelyn Thomson, Eileen Walton, Andrew Johnston

## **ACKNOWLEDGMENT**

We highly acknowledge the following support:

**Data Safety and Monitoring Board:** Polly Bingley (University of Bristol, Bristol, UK), Ulrich Heininger (Division of Paediatric Infectious Diseases and Vaccinology, University Children's Hospital, Basel, Switzerland), Markus Pfirrmann (Institut für Medizinische Informationsverarbeitung, Biometrie und Epidemiologie (IBE), Ludwig-Maximilians-Universität, Munich, Germany), Wolfgang Rascher (Department of Pediatrics and Adolescent Medicine, Erlangen, Germany), Paul Turner (Nuffield Department of Medicine, Medical Science Division, Oxford, UK)

**Beta-cell autoantibody laboratories:**

Institute of Diabetes Research, Helmholtz Zentrum München, Munich, Germany

Bristol Medical School, The University of Bristol, Bristol, UK

**Genotyping Laboratory:**

Grace London, LGC Ltd., Hertfordshire, UK

**Study management/monitoring:**

Helmholtz Zentrum München, Neuherberg, Germany

**Database and electronic questionnaires:**

PHARMALOG GmbH, Ismaning, Germany

**Study product:**

Evolve BioSystems, Inc., Davis, CA, USA

**Study pharmacy:**

Pharmacy of the University Hospital of Heidelberg, Germany

**Biorepository:**

Integrated BioBank of Luxembourg (IBBL), Dudelange, Luxembourg

We thank participating families for their participation in type 1 diabetes research and for helping to develop therapies for prevention.

**Authors' contributions:**

AGZ, MLP and JAT conceived the study, and led the protocol team. All authors (AGZ, SA, AK, PA, RB, EB, KC, HEL, MG, JH, OK, ML, MO, MLP, MP, MDS, AS, JAT) contributed to protocol development. EB, JH, and MP developed the statistical design for the study and wrote the statistical section of the protocol. EB and PA developed the outcome definition of the trial and wrote the autoantibody and outcome section of the protocol. AGZ, SA, AK, and MG drafted the manuscript. All authors reviewed the protocol as well as this manuscript.

**Funding**

The SINT1A study is supported by The Leona M. and Harry B. Helmsley Charitable Trust (Helmsley) Grants #2007-04031 ("The GPPAD-04 study: Supplementation with B. Infantis for Mitigation of Type 1 Diabetes Autoimmunity (SINT1A)"), and by the Helmholtz Zentrum München, Germany. The BMBF trial grant FKZ: 01KX1818 supported advanced genetic risk assessment and trial protocol development phase. The German Clinical Centers Munich and Dresden are also supported by the Deutsches Zentrum für Diabetesforschung DZD. Funding organizations had no role in the design of the trial.

**Competing interests**

JAT is a member of the Scientific Advisory Board of Precion Ltd and of the Human Genetics Advisory Board of GSK.



### General population

DR3/DR4-DQ8 or DR4-DQ8/DR4-DQ8  
and GRS>14.4 or DR3/DR4-DQ8 and GRS = 14.0  
and GG at the rs3763305 SNP

### First degree family history

DR4-DQ8/x\*  
\*not DRB1\*1501, DQB1\*0503 or DRB1\*1303

Randomisation 1:1 (n=1,144)

Activated B. infantis EVC001

Placebo

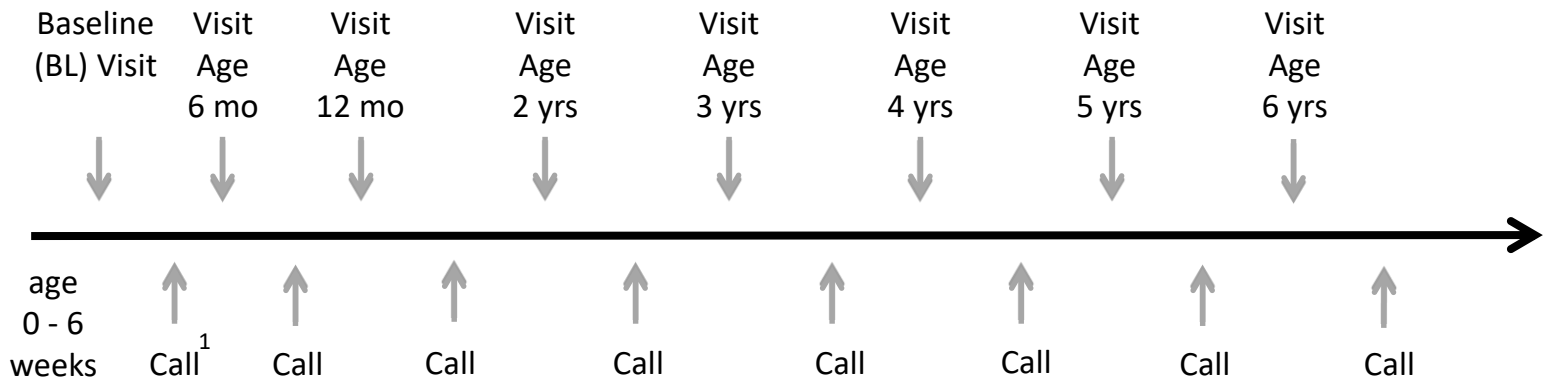

**Primary outcome:** Persistent confirmed multiple beta-cell autoantibodies  
**Secondary outcomes:** Any persistent confirmed beta-cell autoantibody, diabetes, transglutaminase antibodies, respiratory infection rate, safety  
**Exploratory outcomes:** Allergy, antibody response to vaccines, alterations of the gut microbiome or blood metabolome, stool pH and calprotectin

<sup>1</sup> interim telephone calls with families to asses AEs and support trial adherence

## Supplementation with *Bifidobacteria longum* subspecies *infantis* EVC001 for mitigation of type 1 diabetes autoimmunity - The GPPAD-SINT1A Study Protocol

Anette-Gabriele Ziegler, Stefanie Arnolds, Annika Kölln, Peter Achenbach, Reinhard Berner, Ezio Bonifacio, Kristina Casteels, Helena Elding Larsson, Melanie Gündert, Joerg Hasford, Olga Kordonouri, Markus Lundgren, Mariusz Oltarzewski, Marcin L. Pekalski, Markus Pfirrmann, Matthew D. Snape, Agnieszka Szypowska, John A. Todd and the GPPAD Study group

### Supplementary File 1: GPPAD-SINT1A Study: Visit-schedule (Study Flow Chart)

| Visits                                                                                                                   | Intervention                              |                            |                       |                         |                        |
|--------------------------------------------------------------------------------------------------------------------------|-------------------------------------------|----------------------------|-----------------------|-------------------------|------------------------|
|                                                                                                                          | Baseline Visit<br>age 7 days - 6<br>weeks | Call<br>age<br>3month<br>s | Visit<br>age 6 months | Call<br>age 9<br>months | Visit<br>age 12 months |
| Visit window                                                                                                             | +14d                                      | - 14d                      | ± 14d                 | ± 14d                   | + 14d                  |
| Study visit                                                                                                              | 1                                         |                            | 2                     |                         | 3                      |
| Study call                                                                                                               |                                           | 1                          |                       | 2                       |                        |
| Informed consent,<br>Review Incl./Excl. Criteria                                                                         | X                                         |                            |                       |                         |                        |
| Randomization                                                                                                            | X                                         |                            |                       |                         |                        |
| Medical History                                                                                                          | X                                         |                            |                       |                         |                        |
| <b>Intervention</b>                                                                                                      |                                           |                            |                       |                         |                        |
| Dispense supplement and compliance<br>data sheet ( <i>do not administer supplement<br/>at study site, only at home</i> ) | X                                         |                            | X                     |                         |                        |
| <b>Local investigations &amp; measurements</b>                                                                           |                                           |                            |                       |                         |                        |
| Physical examination<br>(height, weight)                                                                                 | X                                         |                            | X                     |                         | X                      |
| Assessment of AEs and SAEs <sup>A</sup>                                                                                  |                                           | X                          | X                     | X                       | X                      |
| Assessment of rotavirus and MMR<br>vaccination schedule using official<br>records                                        |                                           |                            | X                     |                         | X                      |
| Blood glucose <sup>B</sup>                                                                                               |                                           |                            | X                     |                         | X                      |
| HbA1c                                                                                                                    |                                           |                            |                       |                         | X                      |
| <b>Sample collection</b>                                                                                                 |                                           |                            |                       |                         |                        |
| <200 µl capillary or venous blood for<br>glucose                                                                         |                                           |                            | X                     |                         | X                      |
| < 1ml EDTA blood for HbA1c                                                                                               |                                           |                            |                       |                         | X                      |
| 2ml blood for serum samples for central<br>antibody measurement <sup>C, D</sup>                                          |                                           |                            | X                     |                         | X                      |
| 2ml EDTA blood for plasma samples for<br>mechanistic studies<br>(inflammation, metabolomics)                             |                                           |                            | X                     |                         | X                      |
| 2 ml EDTA blood for DNA sample <sup>C</sup>                                                                              |                                           |                            |                       |                         | X                      |

| Visits                                                                 | Intervention                              |                            |                       |                         |                        |
|------------------------------------------------------------------------|-------------------------------------------|----------------------------|-----------------------|-------------------------|------------------------|
|                                                                        | Baseline Visit<br>age 7 days - 6<br>weeks | Call<br>age<br>3month<br>s | Visit<br>age 6 months | Call<br>age 9<br>months | Visit<br>age 12 months |
| Stool sample for microbiome 16S                                        | X                                         | X                          | X                     |                         | X                      |
| Stool sample for colonization                                          |                                           | x                          |                       |                         |                        |
| Stool sample for stool pH & calprotectin<br>(in selected participants) |                                           |                            | X                     |                         |                        |

| Central measurements                                             |                                   |   |   |  |   |
|------------------------------------------------------------------|-----------------------------------|---|---|--|---|
| IAA; GADA; IA-2A; ZnT8RA; ZnT8WA                                 |                                   |   | X |  | X |
| TGA                                                              |                                   |   | X |  | X |
| Stool PCR for B. infantis colonization                           |                                   | X |   |  |   |
| Antibody responses to rotavirus vaccine                          |                                   |   | X |  |   |
| Microbiome 16s <sup>E</sup>                                      | X                                 | X |   |  | X |
| Mechanistic markers<br>(inflammation, metabolomics) <sup>E</sup> |                                   |   | X |  | X |
| Electronic questionnaires completed by families                  |                                   |   |   |  |   |
| Questionnaire about breast-feeding and antibiotics               | every 2 weeks until age 12 months |   |   |  |   |
| Questionnaire about infections and vaccinations                  | every 2 weeks until age 12 months |   |   |  |   |
| Questionnaire about allergies                                    |                                   |   |   |  | X |
| Ancillary assessments                                            |                                   |   |   |  |   |
| Whole blood FACS <sup>F</sup><br>(Dresden and Munich only)       |                                   |   | X |  | X |

<sup>A</sup> AEs/SAEs will be noted and reported as under intervention phase for 30 days after end of treatment day

<sup>B</sup> by handmeter or haemocue

<sup>C</sup> if there is left over material and a signed biobank consent, the left over serum and DNA will be stored in the IBBL or local biobank

<sup>D</sup> venous or capillary blood for the AAB confirmation sample can be obtained by a local physician

<sup>E</sup> measurements may partly be done as exploratory project after unblinding and analysis of main outcomes

<sup>F</sup> to assess maturation of immune cell composition and response

| Visits                                                                          | Follow-up<br>(minimum 2.5 years; maximum up to 5.5 years after end of intervention) |                      |                                                               |                                          |
|---------------------------------------------------------------------------------|-------------------------------------------------------------------------------------|----------------------|---------------------------------------------------------------|------------------------------------------|
|                                                                                 | Call<br>age 18 months                                                               | Visit<br>age 2 years | Call<br>every 12 month<br>(in the middle of<br>yearly visits) | Visit<br>every 12<br>months <sup>G</sup> |
| Visit window                                                                    | ± 30d                                                                               | ± 30d                | ± 30d                                                         | ± 30d                                    |
| Study visit                                                                     |                                                                                     | 4                    |                                                               | 5+                                       |
| Study call                                                                      | 3                                                                                   |                      | 4+                                                            |                                          |
| <b>Local investigations and measurements</b>                                    |                                                                                     |                      |                                                               |                                          |
| Physical examination<br>(height, weight)                                        |                                                                                     | X                    |                                                               | X                                        |
| Assessment of AEs and SAEs <sup>A</sup>                                         | X                                                                                   |                      |                                                               |                                          |
| Assessment of MMR vaccination schedule using<br>official records                |                                                                                     | X                    |                                                               |                                          |
| Blood glucose <sup>B</sup>                                                      |                                                                                     | X                    |                                                               | X                                        |
| <b>Sample collection</b>                                                        |                                                                                     |                      |                                                               |                                          |
| <200 µl capillary or venous blood for glucose                                   |                                                                                     | X                    |                                                               | X                                        |
| 2ml blood for serum samples for central<br>antibody measurement <sup>C, D</sup> |                                                                                     | X                    |                                                               | X                                        |
| 2ml EDTA blood for plasma samples for<br>mechanistic studies (inflammation)     |                                                                                     | X                    |                                                               |                                          |
| <b>Central measurements</b>                                                     |                                                                                     |                      |                                                               |                                          |
| IAA; GADA; IA-2A; ZnT8RA; ZnT8WA                                                |                                                                                     | X                    |                                                               | X                                        |
| TGA                                                                             |                                                                                     | X                    |                                                               | X                                        |
| Antibody Responses to MMR vaccine                                               |                                                                                     | X                    |                                                               |                                          |
| Mechanistic markers (inflammation) <sup>E</sup>                                 |                                                                                     | X                    |                                                               |                                          |
| <b>Electronic questionnaires completed by families</b>                          |                                                                                     |                      |                                                               |                                          |
| Questionnaire about allergies                                                   | every 12 months until end of study                                                  |                      |                                                               |                                          |
| <b>Ancillary assessments</b>                                                    |                                                                                     |                      |                                                               |                                          |
| Whole blood FACS ( <i>Dresden and Munich only</i> )                             |                                                                                     | X                    |                                                               |                                          |

<sup>A</sup> AEs/SAEs will be noted and reported as under intervention phase for 30 days after end of treatment day

<sup>B</sup> by handmeter or haemocue

<sup>C</sup> if there is left over material and a signed biobank consent, the left over serum and DNA will be stored in the IBBL or local biobank

<sup>D</sup> venous or capillary blood for the AAB confirmation sample can be obtained by a local physician

<sup>E</sup> measurements may partly be done as exploratory project after unblinding and analysis of main outcomes

<sup>F</sup> to assess maturation of immune cell composition and response

<sup>G</sup> Final visit must be performed within the last 6 months before last enrolled child completed 2.5 years of follow-up

## PRISMA-P 2015 Checklist

This checklist has been adapted for use with protocol submissions to *Systematic Reviews* from Table 3 in Moher D et al: Preferred reporting items for systematic review and meta-analysis protocols (PRISMA-P) 2015 statement. *Systematic Reviews* 2015 4:1

| Section/topic                     | #  | Checklist item                                                                                                                                                                                  | Information reported     |                          | Page number(s)                                                           |
|-----------------------------------|----|-------------------------------------------------------------------------------------------------------------------------------------------------------------------------------------------------|--------------------------|--------------------------|--------------------------------------------------------------------------|
|                                   |    |                                                                                                                                                                                                 | Yes                      | No                       |                                                                          |
| <b>ADMINISTRATIVE INFORMATION</b> |    |                                                                                                                                                                                                 |                          |                          |                                                                          |
| <b>Title</b>                      |    |                                                                                                                                                                                                 |                          |                          |                                                                          |
| Identification                    | 1a | Identify the report as a protocol of a systematic review                                                                                                                                        | x                        | <input type="checkbox"/> | Title                                                                    |
| Update                            | 1b | If the protocol is for an update of a previous systematic review, identify as such                                                                                                              | <input type="checkbox"/> | <input type="checkbox"/> | Not applicable                                                           |
| <b>Registration</b>               | 2  | If registered, provide the name of the registry (e.g., PROSPERO) and registration number in the Abstract                                                                                        | x                        | <input type="checkbox"/> | End of Abstract, page 3                                                  |
| <b>Authors</b>                    |    |                                                                                                                                                                                                 |                          |                          |                                                                          |
| Contact                           | 3a | Provide name, institutional affiliation, and e-mail address of all protocol authors; provide physical mailing address of corresponding author                                                   | x                        | <input type="checkbox"/> | Title page                                                               |
| Contributions                     | 3b | Describe contributions of protocol authors and identify the guarantor of the review                                                                                                             | x                        | <input type="checkbox"/> | Authors' contributions, page 17, 18                                      |
| <b>Amendments</b>                 | 4  | If the protocol represents an amendment of a previously completed or published protocol, identify as such and list changes; otherwise, state plan for documenting important protocol amendments | <input type="checkbox"/> | <input type="checkbox"/> | Not applicable                                                           |
| <b>Support</b>                    |    |                                                                                                                                                                                                 |                          |                          |                                                                          |
| Sources                           | 5a | Indicate sources of financial or other support for the review                                                                                                                                   | x                        | <input type="checkbox"/> | Funding, page 18                                                         |
| Sponsor                           | 5b | Provide name for the review funder and/or sponsor                                                                                                                                               | x                        | <input type="checkbox"/> | Methods, study organisation, page 6                                      |
| Role of sponsor/funder            | 5c | Describe roles of funder(s), sponsor(s), and/or institution(s), if any, in developing the protocol                                                                                              | x                        | <input type="checkbox"/> | Methods, study organisation, page 6, Authors' contributions, page 17, 18 |

| Section/topic               | #   | Checklist item                                                                                                                                                                                                            | Information reported     |                          | Page number(s)                                                 |
|-----------------------------|-----|---------------------------------------------------------------------------------------------------------------------------------------------------------------------------------------------------------------------------|--------------------------|--------------------------|----------------------------------------------------------------|
|                             |     |                                                                                                                                                                                                                           | Yes                      | No                       |                                                                |
| <b>INTRODUCTION</b>         |     |                                                                                                                                                                                                                           |                          |                          |                                                                |
| <b>Rationale</b>            | 6   | Describe the rationale for the review in the context of what is already known                                                                                                                                             | x                        | <input type="checkbox"/> | Introduction, Rationale for use of oral insulin..., page 5     |
| <b>Objectives</b>           | 7   | Provide an explicit statement of the question(s) the review will address with reference to participants, interventions, comparators, and outcomes (PICO)                                                                  | x                        | <input type="checkbox"/> | Introduction, page 4-5                                         |
| <b>METHODS</b>              |     |                                                                                                                                                                                                                           |                          |                          |                                                                |
| <b>Eligibility criteria</b> | 8   | Specify the study characteristics (e.g., PICO, study design, setting, time frame) and report characteristics (e.g., years considered, language, publication status) to be used as criteria for eligibility for the review | x                        | <input type="checkbox"/> | Methods, page 6-11                                             |
| <b>Information sources</b>  | 9   | Describe all intended information sources (e.g., electronic databases, contact with study authors, trial registers, or other grey literature sources) with planned dates of coverage                                      | <input type="checkbox"/> | <input type="checkbox"/> | Not applicable                                                 |
| <b>Search strategy</b>      | 10  | Present draft of search strategy to be used for at least one electronic database, including planned limits, such that it could be repeated                                                                                | <input type="checkbox"/> | <input type="checkbox"/> | Not applicable                                                 |
| <b>STUDY RECORDS</b>        |     |                                                                                                                                                                                                                           |                          |                          |                                                                |
| Data management             | 11a | Describe the mechanism(s) that will be used to manage records and data throughout the review                                                                                                                              | x                        | <input type="checkbox"/> | eCRFs, page 9                                                  |
| Selection process           | 11b | State the process that will be used for selecting studies (e.g., two independent reviewers) through each phase of the review (i.e., screening, eligibility, and inclusion in meta-analysis)                               | <input type="checkbox"/> | <input type="checkbox"/> | Not applicable                                                 |
| Data collection process     | 11c | Describe planned method of extracting data from reports (e.g., piloting forms, done independently, in duplicate), any processes for obtaining and confirming data from investigators                                      | <input type="checkbox"/> | <input type="checkbox"/> | Not applicable                                                 |
| <b>Data items</b>           | 12  | List and define all variables for which data will be sought (e.g., PICO items, funding sources), any pre-planned data assumptions and simplifications                                                                     | x                        | <input type="checkbox"/> | Analysis, Primary outcome and analysis, Secondary outcomes and |

| Section/topic                             | #   | Checklist item                                                                                                                                                                                                                              | Information reported     |                          | Page number(s)                                                                      |
|-------------------------------------------|-----|---------------------------------------------------------------------------------------------------------------------------------------------------------------------------------------------------------------------------------------------|--------------------------|--------------------------|-------------------------------------------------------------------------------------|
|                                           |     |                                                                                                                                                                                                                                             | Yes                      | No                       |                                                                                     |
|                                           |     |                                                                                                                                                                                                                                             |                          |                          | analyses, page 11,12                                                                |
| <b>Outcomes and prioritization</b>        | 13  | List and define all outcomes for which data will be sought, including prioritization of main and additional outcomes, with rationale                                                                                                        | x                        | <input type="checkbox"/> | Analysis, Primary outcome and analysis, Secondary outcomes and analyses, page 11,12 |
| <b>Risk of bias in individual studies</b> | 14  | Describe anticipated methods for assessing risk of bias of individual studies, including whether this will be done at the outcome or study level, or both; state how this information will be used in data synthesis                        | <input type="checkbox"/> | <input type="checkbox"/> | Not applicable                                                                      |
| <b>DATA</b>                               |     |                                                                                                                                                                                                                                             |                          |                          |                                                                                     |
| <b>Synthesis</b>                          | 15a | Describe criteria under which study data will be quantitatively synthesized                                                                                                                                                                 | <input type="checkbox"/> | <input type="checkbox"/> | Not applicable                                                                      |
|                                           | 15b | If data are appropriate for quantitative synthesis, describe planned summary measures, methods of handling data, and methods of combining data from studies, including any planned exploration of consistency (e.g., $I^2$ , Kendall's tau) | <input type="checkbox"/> | <input type="checkbox"/> | Not applicable                                                                      |
|                                           | 15c | Describe any proposed additional analyses (e.g., sensitivity or subgroup analyses, meta-regression)                                                                                                                                         | x                        | <input type="checkbox"/> | Analysis, Primary outcome and analysis, Secondary outcomes and analyses, page 11,12 |
|                                           | 15d | If quantitative synthesis is not appropriate, describe the type of summary planned                                                                                                                                                          | <input type="checkbox"/> | <input type="checkbox"/> | Not applicable                                                                      |
| <b>Meta-bias(es)</b>                      | 16  | Specify any planned assessment of meta-bias(es) (e.g., publication bias across studies, selective reporting within studies)                                                                                                                 | <input type="checkbox"/> | <input type="checkbox"/> | Not applicable                                                                      |
| <b>Confidence in cumulative evidence</b>  | 17  | Describe how the strength of the body of evidence will be assessed (e.g., GRADE)                                                                                                                                                            | x                        | <input type="checkbox"/> | Study power and accrual target, page 12                                             |

# BMJ Open

## Supplementation with *Bifidobacteria longum* subspecies *infantis* EVC001 for mitigation of type 1 diabetes autoimmunity - The GPPAD-SINT1A randomised controlled trial protocol

|                               |                                                                                                                                                                                                                                                                                                                                                                                                                                                                                                                                                                                                                                                                                                                                                                                                                                                                                                                                                                                                                                                                                                                                                                                                                                                                                                                                                                                                                                                                                                                                                                                                                                                                                                                                                                                                                                                                                                                                                                                                                                                                                                                                                                                                                                    |
|-------------------------------|------------------------------------------------------------------------------------------------------------------------------------------------------------------------------------------------------------------------------------------------------------------------------------------------------------------------------------------------------------------------------------------------------------------------------------------------------------------------------------------------------------------------------------------------------------------------------------------------------------------------------------------------------------------------------------------------------------------------------------------------------------------------------------------------------------------------------------------------------------------------------------------------------------------------------------------------------------------------------------------------------------------------------------------------------------------------------------------------------------------------------------------------------------------------------------------------------------------------------------------------------------------------------------------------------------------------------------------------------------------------------------------------------------------------------------------------------------------------------------------------------------------------------------------------------------------------------------------------------------------------------------------------------------------------------------------------------------------------------------------------------------------------------------------------------------------------------------------------------------------------------------------------------------------------------------------------------------------------------------------------------------------------------------------------------------------------------------------------------------------------------------------------------------------------------------------------------------------------------------|
| Journal:                      | <i>BMJ Open</i>                                                                                                                                                                                                                                                                                                                                                                                                                                                                                                                                                                                                                                                                                                                                                                                                                                                                                                                                                                                                                                                                                                                                                                                                                                                                                                                                                                                                                                                                                                                                                                                                                                                                                                                                                                                                                                                                                                                                                                                                                                                                                                                                                                                                                    |
| Manuscript ID                 | bmjopen-2021-052449.R1                                                                                                                                                                                                                                                                                                                                                                                                                                                                                                                                                                                                                                                                                                                                                                                                                                                                                                                                                                                                                                                                                                                                                                                                                                                                                                                                                                                                                                                                                                                                                                                                                                                                                                                                                                                                                                                                                                                                                                                                                                                                                                                                                                                                             |
| Article Type:                 | Protocol                                                                                                                                                                                                                                                                                                                                                                                                                                                                                                                                                                                                                                                                                                                                                                                                                                                                                                                                                                                                                                                                                                                                                                                                                                                                                                                                                                                                                                                                                                                                                                                                                                                                                                                                                                                                                                                                                                                                                                                                                                                                                                                                                                                                                           |
| Date Submitted by the Author: | 14-Sep-2021                                                                                                                                                                                                                                                                                                                                                                                                                                                                                                                                                                                                                                                                                                                                                                                                                                                                                                                                                                                                                                                                                                                                                                                                                                                                                                                                                                                                                                                                                                                                                                                                                                                                                                                                                                                                                                                                                                                                                                                                                                                                                                                                                                                                                        |
| Complete List of Authors:     | <p>Ziegler, Anette; Helmholtz Zentrum Munchen Deutsches Forschungszentrum fur Umwelt und Gesundheit, Institute of Diabetes Research; Klinikum rechts der Isar der Technischen Universitat Munchen, Forschergruppe Diabetes</p> <p>Arnolds, Stefanie; Helmholtz Zentrum Munchen Deutsches Forschungszentrum fur Umwelt und Gesundheit, Institute of Diabetes Research</p> <p>Kölln, Annika; Helmholtz Zentrum Munchen Deutsches Forschungszentrum fur Umwelt und Gesundheit, Institute of Diabetes Research</p> <p>Achenbach, Peter; Helmholtz Zentrum Munchen Deutsches Forschungszentrum fur Umwelt und Gesundheit, Institute of Diabetes Research; Klinikum rechts der Isar der Technischen Universitat Munchen, Forschergruppe Diabetes</p> <p>Berner, Reinhard; Universitätsklinikum Carl Gustav Carus, Klinik und Poliklinik für Kinder- und Jugendmedizin</p> <p>Bonifacio, Ezio; Zentrum fur Regenerative Therapien Dresden</p> <p>Casteels , Kristina; Universitair Ziekenhuis Leuven Context, Department of Pediatrics; KU Leuven Department of Development and Regeneration</p> <p>Elding Larsson, Helena ; Lunds Universitet, Unit for Pediatric Endocrinology, Department of Clinical Sciences Malmö; Skåne University Hospital Lund, Department of Paediatrics</p> <p>Gündert, Melanie; Helmholtz Zentrum Munchen Deutsches Forschungszentrum fur Umwelt und Gesundheit, Institute of Diabetes Research</p> <p>Hasford, Joerg; Ludwig-Maximilians-Universitat Munchen, Institut für Med. Informationsverarbeitung, Biometrie und Epidemiologie</p> <p>Kordonouri, Olga; Hannoversche Kinderheilstalt, Allgemeine Kinderheilkunde</p> <p>Lundgren, Markus; Lunds Universitet, Unit for Pediatric Endocrinology, Department of Clinical Sciences Malmö</p> <p>Oltarzewski, Mariusz; Institute of Mother and Child</p> <p>Pekalski, Marcin; Wellcome Trust Centre for Human Genetics, Nuffield Department of Medicine, NIHR Biomedical Research Centre</p> <p>Pfirschmann, Markus; Ludwig Maximilians Universität München Institut für medizinische Informationsverarbeitung Biometrie und Epidemiologie, Biometrie und Epidemiologie</p> <p>Snape, Matthew; University of Oxford, Department of Paediatrics; Oxford</p> |



|                                    |                                                                                                                                                                                                                                                                                        |
|------------------------------------|----------------------------------------------------------------------------------------------------------------------------------------------------------------------------------------------------------------------------------------------------------------------------------------|
|                                    | University Hospitals NHS Trust, NIHR Oxford Biomedical Research Centre<br>Szypowska, Agnieszka; Medical University of Warsaw, Department of Paediatrics<br>Todd, John; University of Oxford, Wellcome Centre for Human Genetics, Nuffield Department of Medicine<br>Study group, GPPAD |
| <b>Primary Subject Heading</b> :   | Diabetes and endocrinology                                                                                                                                                                                                                                                             |
| <b>Secondary Subject Heading</b> : | Paediatrics                                                                                                                                                                                                                                                                            |
| <b>Keywords</b> :                  | General diabetes < DIABETES & ENDOCRINOLOGY, IMMUNOLOGY, Diabetes & endocrinology < INTERNAL MEDICINE, PAEDIATRICS, DIABETES & ENDOCRINOLOGY, EPIDEMIOLOGY                                                                                                                             |
|                                    |                                                                                                                                                                                                                                                                                        |

SCHOLARONE™  
Manuscripts



I, the Submitting Author has the right to grant and does grant on behalf of all authors of the Work (as defined in the below author licence), an exclusive licence and/or a non-exclusive licence for contributions from authors who are: i) UK Crown employees; ii) where BMJ has agreed a CC-BY licence shall apply, and/or iii) in accordance with the terms applicable for US Federal Government officers or employees acting as part of their official duties; on a worldwide, perpetual, irrevocable, royalty-free basis to BMJ Publishing Group Ltd ("BMJ") its licensees and where the relevant Journal is co-owned by BMJ to the co-owners of the Journal, to publish the Work in this journal and any other BMJ products and to exploit all rights, as set out in our [licence](#).

The Submitting Author accepts and understands that any supply made under these terms is made by BMJ to the Submitting Author unless you are acting as an employee on behalf of your employer or a postgraduate student of an affiliated institution which is paying any applicable article publishing charge ("APC") for Open Access articles. Where the Submitting Author wishes to make the Work available on an Open Access basis (and intends to pay the relevant APC), the terms of reuse of such Open Access shall be governed by a Creative Commons licence – details of these licences and which [Creative Commons](#) licence will apply to this Work are set out in our licence referred to above.

Other than as permitted in any relevant BMJ Author's Self Archiving Policies, I confirm this Work has not been accepted for publication elsewhere, is not being considered for publication elsewhere and does not duplicate material already published. I confirm all authors consent to publication of this Work and authorise the granting of this licence.

# Supplementation with *Bifidobacteria longum* subspecies *infantis* EVC001 for mitigation of type 1 diabetes autoimmunity - The GPPAD-SINT1A randomised controlled trial protocol

Anette-Gabriele Ziegler<sup>1,2</sup>, Stefanie Arnolds<sup>1</sup>, Annika Kölln<sup>1</sup>, Peter Achenbach<sup>1,2</sup>, Reinhard Berner<sup>3</sup>, Ezio Bonifacio<sup>4</sup>, Kristina Casteels<sup>5,6</sup>, Helena Elding Larsson<sup>7,8</sup>, Melanie Gündert<sup>1</sup>, Joerg Hasford<sup>9</sup>, Olga Kordonouri<sup>10</sup>, Markus Lundgren<sup>7</sup>, Mariusz Oltarzewski<sup>11</sup>, Marcin L. Pekalski<sup>12</sup>, Markus Pfirrmann<sup>9</sup>, Matthew D. Snape<sup>13,14</sup>, Agnieszka Szypowska<sup>15</sup>, John A. Todd<sup>12</sup> and the GPPAD Study group

1 Institute of Diabetes Research, Helmholtz Zentrum München, Neuherberg, Germany

2 Forschergruppe Diabetes, Klinikum rechts der Isar, Technische Universität München, Medical faculty, Munich, Germany

3 Department of Pediatrics, University Hospital Carl Gustav Carus, Technische Universität Dresden, Dresden, Germany

4 Center for Regenerative Therapies Dresden (CRTD), Faculty of Medicine, Technische Universität Dresden, Dresden, Germany.

5 Department of Pediatrics, University Hospitals Leuven, Leuven, Belgium

6 Department of Development and Regeneration, KU Leuven, Leuven, Belgium

7 Unit for Pediatric Endocrinology, Department of Clinical Sciences Malmö, Lund University, Sweden

8 Department of Paediatrics, Skåne University Hospital, Malmö, Sweden

9 Institut für Medizinische Informationsverarbeitung, Biometrie und Epidemiologie, Ludwig-Maximilians-Universität München, Munich, Germany

10 Kinder- und Jugendkrankenhaus AUF DER BULT, Hannover, Germany

11 Institute of Mother and Child, Warsaw, Poland

12 Wellcome Centre for Human Genetics, Nuffield Department of Medicine, NIHR Biomedical Research Centre, University of Oxford, Oxford, UK

13 Department of Paediatrics, University of Oxford, Oxford, UK

14 NIHR Oxford Biomedical Research Centre, Oxford University Hospitals NHS Trust, Oxford, UK

15 Department of Paediatrics, Medical University of Warsaw, Warsaw, Poland

Corresponding author: Anette Gabriele Ziegler, Institute of Diabetes Research, Helmholtz Zentrum München and Forschergruppe Diabetes, Klinikum rechts der Isar, Technische Universität München, Neuherberg, Germany

email: anette-g.ziegler@helmholtz-muenchen.de, Tel.: 0049-89-3187-2896

**Word count:** 4672

**Keywords:** type 1 diabetes, islet autoantibody, probiotic *Bifidobacteria longum* subspecies *infantis* EVC001, GPPAD, SINT1A, prevention trial

## **Timeline of the study:**

Recruitment: 3.0 years

Start (FPFV): April 2021

Intervention: *B. infantis* EVC001

Intervention period: Until age 12 months

1  
2  
3 Follow-up after intervention: 2.5-5.5 years

4 Intended End (LPLV): October 2027

5 Protocol: V 1.0 November 09<sup>th</sup>, 2020  
6  
7  
8

9 **Abbreviations:**

|                       |                                                                                        |
|-----------------------|----------------------------------------------------------------------------------------|
| 10 AE                 | Adverse Events                                                                         |
| 11                    |                                                                                        |
| 12                    |                                                                                        |
| 13 ADA                | American Diabetes Association                                                          |
| 14                    |                                                                                        |
| 15 <i>B. infantis</i> | <i>Bifidobacterium longum</i> subspecies <i>infantis</i> EVC001                        |
| 16                    |                                                                                        |
| 17 CC                 | Coordinating Centre                                                                    |
| 18                    |                                                                                        |
| 19 CFU                | Colony Forming Units                                                                   |
| 20                    |                                                                                        |
| 21 CI                 | Confidence Interval                                                                    |
| 22                    |                                                                                        |
| 23 DSMB               | Data Safety Monitoring Board                                                           |
| 24                    |                                                                                        |
| 25 eCRF               | electronic Case Report Form                                                            |
| 26                    |                                                                                        |
| 27 FPG                | Fasting Plasma Glucose                                                                 |
| 28                    |                                                                                        |
| 29 GRS                | Genetic risk score                                                                     |
| 30                    |                                                                                        |
| 31 GPPAD              | Global Platform for the Prevention of Autoimmune Diabetes                              |
| 32                    |                                                                                        |
| 33 HLA                | Human Leukocyte Antigen                                                                |
| 34                    |                                                                                        |
| 35 OGTT               | Oral glucose tolerance test                                                            |
| 36                    |                                                                                        |
| 37 POInT              | Primary Oral Insulin Trial                                                             |
| 38                    |                                                                                        |
| 39 SAE                | Serious Adverse Events                                                                 |
| 40                    |                                                                                        |
| 41 SCFAs              | short chain fatty acids                                                                |
| 42                    |                                                                                        |
| 43 SINT1A             | Supplementation with <i>B. infantis</i> for mitigation of type 1 diabetes autoimmunity |
| 44                    |                                                                                        |
| 45 SNP                | Single nucleotide polymorphism                                                         |
| 46                    |                                                                                        |
| 47 T1D                | Type 1 diabetes                                                                        |
| 48                    |                                                                                        |
| 49                    |                                                                                        |
| 50                    |                                                                                        |
| 51                    |                                                                                        |
| 52                    |                                                                                        |
| 53                    |                                                                                        |
| 54                    |                                                                                        |
| 55                    |                                                                                        |
| 56                    |                                                                                        |
| 57                    |                                                                                        |
| 58                    |                                                                                        |
| 59                    |                                                                                        |
| 60                    |                                                                                        |

## ABSTRACT

**Introduction:** The GPPAD-SINT1A Study is designed as a randomised, placebo-controlled, double blind, multicentre, multinational, primary prevention study aiming to assess whether daily administration of *B. infantis* from age 7 days to 6 weeks until age 12 months to children with elevated genetic risk for type 1 diabetes reduces the cumulative incidence of beta-cell autoantibodies in childhood.

**Methods and analysis:** Infants aged 7 days to 6 weeks from Germany, Poland, Belgium, UK and Sweden are eligible for study participation if they have a >10.0% expected risk for developing multiple beta-cell autoantibodies by age 6 years as determined by genetic risk score or family history and HLA genotype. Infants are randomized 1:1 to daily administration of *B. infantis* EVC001 or placebo until age 12 months, and followed for a maximum of 5.5 years thereafter. The primary outcome is the development of persistent confirmed multiple beta-cell autoantibodies. Secondary outcomes are 1. Any persistent confirmed beta-cell autoantibody, defined as at least one confirmed autoantibody in two consecutive samples, including IAA, GADA, IA-2A or ZnT8A, 2. Diabetes, 3. Transglutaminase autoantibodies associated with celiac disease, 4. Respiratory infection rate in first year of life during supplementation, 5. Safety. Exploratory outcomes include allergy, antibody response to vaccines, alterations of the gut microbiome or blood metabolome, stool pH and calprotectin.

**Ethics and dissemination:** The study was approved by the local ethical committees of the Technical University Munich, Medical Faculty, the Technische Universität Dresden, the Medizinische Hochschule Hannover, the Medical University of Warsaw, EC Research UZ Leuven, and the Swedish ethical review authority. The results will be disseminated through peer-reviewed journals and conference presentations and will be openly shared after completion of the study.

**Registration:** [clincov id: NCT04769037](https://clinicaltrials.gov/ct2/show/study/NCT04769037)

### Strengths and limitations of this study

- This is the first adequately powered placebo controlled study to test the supplementation with *B. infantis* for mitigation of type 1 diabetes autoimmunity.
- Includes other health outcomes such as celiac autoimmunity, respiratory infections, allergy, antibody response (IgG titres) to vaccines, alterations of the gut microbiome or blood metabolome, measurement of stool pH and calprotectin.
- The requirement to identify eligible at-risk infants by genetic screening does not allow to introduce *B. infantis* supplementation in the first days of life or during pregnancy, when it may be most beneficial.

- 1  
2  
3  
4  
5  
6  
7  
8  
9  
10  
11  
12  
13  
14  
15  
16  
17  
18  
19  
20  
21  
22  
23  
24  
25  
26  
27  
28  
29  
30  
31  
32  
33  
34  
35  
36  
37  
38  
39  
40  
41  
42  
43  
44  
45  
46  
47  
48  
49  
50  
51  
52  
53  
54  
55  
56  
57  
58  
59  
60
- There could be advantages in using multiple probiotic strains with complementary metabolic capacities.
  - It may have been advantageous to add a prebiotic to the *B. infantis* formulation to compensate for the possibility that some mothers stopped breast feeding early in the trial.

For peer review only

## INTRODUCTION

Type 1 diabetes (T1D) results from an immune-mediated destruction of the pancreatic islet beta-cells resulting in insulin deficiency. This process is clinically silent and can be identified by circulating autoantibodies to beta-cell antigens (glutamic acid decarboxylase (GADA), islet tyrosine phosphatase 2 (IA-2A), insulin (IAA) and zinc transporter 8 (ZnT8A) (1). Beta-cell autoantibodies occur early in life with a peak incidence period between age 9 months and 3 years (2, 3, 4), and the risk to develop multiple beta-cell autoantibodies exponentially declines with age (5, 6). On the basis of these findings, it is concluded that any interventional therapy given as a primary prevention strategy must be started early in life.

This randomised, placebo-controlled study will evaluate whether supplementation with a daily dose of a probiotic in the first year of life can reduce the risk of developing beta-cell autoimmunity in children identified by the Global Platform for the Prevention of Autoimmune Diabetes (GPPAD) as being genetically at risk for developing T1D (previously described in detail in 7 and 8). The rationale for this study combines the most recent findings concerning the specific role that the commensal bacteria, microbiota, and their genes, the microbiome, could play in the induction of peripheral tolerance to insulin (9, 10, 11, 12), and builds on knowledge of the reported health and clinical benefits of early probiotic supplementation in peanut allergy prevention (13) and in lowering mortality owing to sepsis in children (14). Although it is widely accepted that the induction of the state of tolerance to beneficial bacteria during early life is critical for a newborn's survival, the clinical benefit for the prevention of immune-related diseases is only now being explored. It is believed that tolerance is achieved when the innate and adaptive immune cells promote tolerogenic immune responses to dietary and commensal antigens as well as reactions to a variety of beneficial metabolites produced by commensal microbes, in particular the short chain fatty acids (SCFAs) (15, 16, 17, 18, 19). The SINT1A study follows the ongoing Primary Oral Insulin Trial (POInT) (8), which administers insulin orally to train and sensitize the immune system at an early stage via gut exposure so that autoimmunity against insulin does not occur.

### **Evidence for dysbiosis in children prior to the development of type 1 diabetes**

Evidence that microbiome changes may alter the risk for T1D is presented by a number of prospective studies which have shown that changes in the microbiome precede the development of beta-cell autoimmunity and T1D. These include the BABYDIET study where alterations in microbial interaction networks were observed at age 0.5 and 2 years in children who developed beta-cell autoimmunity (9), and studies from Finland where higher abundances of *Bacteroides dorei* (20) and a decrease in microbial diversity were described in children with genetic predisposition to T1D (21). The TEDDY study

1  
2  
3 confirmed these alterations and found that the microbiome of children who did not develop beta-cell  
4 autoimmunity contained more genes that were related to fermentation and the biosynthesis of short-chain  
5 fatty acids (SCFA) supporting the protective effects of SCFA in early-onset human T1D (10).  
6  
7 Furthermore, the TEDDY study has reported that probiotic supplementation in the first 27 days of life,  
8 and only in this early period (documented by questionnaires and diary records) was associated with a  
9 decreased risk of beta-cell autoimmunity providing the first evidence that correcting dysbiosis in infants  
10 may be beneficial for children at risk of T1D (11). A recent finding links microbial metabolism to insulin-  
11 specific immune responses: the microbial enzymes belonging to the transketolase superfamily contain the  
12 primary insulin autoantigenic epitope (INS B:9-25). The microbial transketolase upregulation reflects the  
13 adaptation of the microbiome to digest sugar polymers during weaning and matches the time of  
14 autoantibody appearance against insulin. It has been suggested that an immune response to insulin  
15 mimotopes due to commensal dysbiosis is a possible primary cause of T1D (12).  
16  
17 Altogether, these results suggest that correcting dysbiosis in early life could help to promote immune  
18 tolerance and thus inhibit the initiation of beta-cell autoimmunity.  
19  
20  
21  
22  
23  
24  
25  
26

### 27 **Previous clinical studies using *B. infantis* in children**

28 A substantial body of evidence has connected gut inflammation with improper immune programming and  
29 the subsequent development of autoimmune conditions including T1D, atopic dermatitis, food allergies  
30 and asthma (19, 22). Bifidobacteria and in particular *Bifidobacterium longum* subspecies *infantis* (*B.*  
31 *infantis*) have positive properties that potentially counteract the development of gut inflammation in the  
32 first few months of life (23, 24). Depleted numbers of *Bifidobacteria* are associated with immune-related  
33 diseases such as allergy (25, 26). *Bacteroides* species, which are naturally outcompeted by *Bifidobacteria*,  
34 are present at higher numbers within the microbiota of children with high susceptibility to autoimmunity  
35 (19). There is additional evidence that Bifidobacterium abundance in early infancy increases protective  
36 efficacy of vaccines by enhancing immunologic memory (27). Lactic acid bacteria and bifidobacteria are  
37 increasingly administered to pregnant women and infants with the intention of improving health. A  
38 number of clinical studies have been conducted to document the safety and health benefits of dietary  
39 supplementation with bacterial strains (probiotics). Previous clinical studies using *B. infantis* are  
40 summarized in **Table 1**.  
41  
42  
43  
44  
45  
46  
47  
48  
49  
50  
51  
52  
53  
54  
55  
56  
57  
58  
59  
60



**Table 1:** Clinical studies on *B. infantis*

| Reference | Number of participants* | Main results                                                                                                                                                    |
|-----------|-------------------------|-----------------------------------------------------------------------------------------------------------------------------------------------------------------|
| (28)      | 80                      | Safe consumption and good tolerance of <i>B. infantis</i> ; stools significantly fewer and better formed                                                        |
| (29)      | 66                      | Significant changes to faecal microbiome composition; colonization with <i>B. infantis</i> ; higher abundance of faecal short chain fatty acids; lower stool pH |
| (30)      | 40                      | Lower fecal calprotectin levels; lower enteric inflammation                                                                                                     |

\* participants in total, meaning the group of children *B. infantis* fed and the group placebo fed (for all: treatment from day 7 on, dose  $1.8-2.8 \times 10^{10}$  CFU (colony forming units)), all participants were breast-fed infants

These studies show first evidence that supplementation with *B. infantis* is safe (28, 29, 30). The IMPRINT study demonstrates that supplementation with *B. infantis* ( $1.8-2.8 \times 10^{10}$  CFU) for 14 days (from day 7 to day 21) is well tolerated (28). Stools are fewer and better formed in infants in the supplementation group compared to the non-supplemented group. A follow-up study indicates that supplementation results in significant changes of the faecal microbiome composition (29) including evidence of persistent colonization of the probiotic organism. Infants colonized by Bifidobacteriaceae have 4-fold-lower faecal endotoxin levels, consistent with observed lower levels of Gram-negative Proteobacteria and Bacteroidetes, lower stool pH, and higher faecal concentrations of short chain fatty acids (29). In addition, pro-inflammatory cytokines are significantly lower in *B. infantis*-fed infants (30). The mentioned results suggest that correcting dysbiosis in early life could help to promote immune tolerance and thus inhibit the initiation of beta-cell autoimmunity. In this context, a supplementation with *B. infantis* seems promising.

### Primary Objective

To determine whether daily administration of *B. infantis* EVC001 from age 7 days to 6 weeks until age 12 months to children with elevated genetic risk for T1D reduces the cumulative incidence of beta-cell autoantibodies in childhood.

## METHODS

### Outcome measures

#### Primary outcome

The primary outcome of SINT1A is the elapsed time from random treatment assignment to the development of persistent confirmed multiple beta-cell autoantibodies. For subjects who developed

1  
2  
3 persistent confirmed multiple beta-cell autoantibodies, the elapsed time will be from the random treatment  
4 assignment to the first confirmed autoantibody positive sample used in defining the persistent confirmed  
5 multiple beta-cell autoantibody positive status. It is expected that beta-cell autoantibodies will be detected  
6 prior to T1D diagnosis; however, the presence of diabetes in the absence of multiple beta-cell  
7 autoantibodies is also considered as a primary outcome endpoint, and in this case, the date of diagnosis is  
8 the time of the end point.  
9

10  
11  
12 The study primary outcome is realized with either persistent confirmed multiple beta-cell autoantibodies  
13 or Oral Glucose Tolerance Test (OGTT) criteria for diabetes or clinical criteria for diabetes.  
14

### 15 **Criteria for persistent confirmed beta-cell autoantibodies**

16  
17 Criteria are based on the measurement of beta-cell autoantibodies against insulin (IAA), GAD65  
18 (GADA), IA-2 (IA-2A), and ZnT8 (ZnT8A) tested in the GPPAD central autoantibody laboratory and, if  
19 positive, confirmed in the GPPAD confirmatory laboratory.  
20

21  
22 Confirmed IAA is defined as sample positive for IAA in both the GPPAD central and confirmatory  
23 laboratories. Confirmed GADA is defined as sample positive for GADA in both the GPPAD central and  
24 confirmatory laboratories. Confirmed IA-2A is defined as sample positive for IA-2A in both the GPPAD  
25 central and confirmatory laboratories. Confirmed ZnT8A is defined as sample positive for ZnT8RA or  
26 ZnT8WA in both the GPPAD central and confirmatory laboratories.  
27

28  
29 The status persistent confirmed beta-cell autoantibody-positive is defined as confirmed IAA, confirmed  
30 GADA, confirmed IA-2A, or confirmed ZnT8A in two consecutive samples. Persistent confirmed  
31 multiple beta-cell autoantibodies (primary outcome) is defined as confirmed IAA, confirmed GADA,  
32 confirmed IA-2A, or confirmed ZnT8A in two consecutive samples, AND at least one other confirmed  
33 antibody from these four antibodies in one sample. Persistent confirmed beta-cell autoantibodies that are  
34 considered maternally derived are NOT included as positive for the primary outcome.  
35

### 36 **Criteria for T1D diagnosis**

37  
38 Diabetes may be diagnosed in a small number of children before a persistent confirmed multiple islet  
39 autoantibody positive status is achieved as the multiple autoantibody outcome requires two consecutive  
40 positive samples. In these cases, the primary outcome status is assigned to the child.  
41

42  
43 Criteria for T1D diagnosis are, as defined by the American Diabetes Association (ADA), based on  
44 glucose testing, or the presence of unequivocal hyperglycaemia with acute metabolic decompensation  
45 (diabetic ketoacidosis). One of the following criteria must be met on two occasions as soon as possible  
46 but no less than 1 day apart for diabetes to be defined:  
47

48  
49 1. Symptoms of diabetes and a casual plasma glucose  $\geq 200$  mg/dL (11.1mmol/L).  
50

51  
52 Casual is defined as any time of day without regard to time since last meal. The classic symptoms of  
53 diabetes include polyuria, polydipsia, and unexplained weight loss.  
54  
55  
56  
57

1  
2  
3 OR

4 2. Fasting plasma glucose (FPG)  $\geq 126$  mg/dL (7 mmol/L). Fasting is defined as no caloric intake for at  
5 least 8 hours.  
6

7  
8 OR

9 3. Two-hour plasma glucose (PG)  $\geq 200$  mg/dL (11.1 mmol/L) during an OGTT. The test should be  
10 performed using a glucose load containing the equivalent of 1.75g/kg body weight to a maximum of 75g  
11 anhydrous glucose dissolved in water. It is preferred that at least one of the two testing occasions involve  
12 an OGTT.  
13

14  
15 Cases diagnosed with T1D will be adjudicated by the Endpoint Committee. Study participation will be  
16 terminated if T1D is reached.  
17

### 18 **Secondary outcomes**

19  
20 Secondary outcomes of the study are: 1. The development of any persistent confirmed beta-cell  
21 autoantibody, defined as at least one confirmed autoantibody in two consecutive samples, including IAA,  
22 GADA, IA-2A or ZnT8A, 2. Diabetes, 3. The development of persistent confirmed transglutaminase  
23 antibodies associated with celiac disease, defined as confirmed autoantibody in two consecutive samples,  
24 4. Respiratory infection rate in first year of life during supplementation and 5. Safety.  
25

### 26 **Exploratory outcomes**

27  
28 The following exploratory outcomes may be assessed or in part assessed on a portion of the participants.  
29 They may not necessarily be included in the primary outcome analysis and publication: 1. Allergy, 2.  
30 Antibody response (IgG titres) to vaccines, 3. Alterations of the stool microbiome or 4. Blood  
31 metabolome, 5. Stool pH and 6. Stool calprotectin concentration.  
32  
33

### 34 **Study design and organisation**

35  
36 SINT1A will be conducted as an investigator-initiated, randomized, placebo-controlled, double-blind  
37 multi-center intervention study through GPPAD, a network of collaborating clinical study centres from  
38 European countries with sites in Belgium (Leuven), Germany (Dresden, Hannover, Munich), Poland  
39 (Warsaw), Sweden (Malmö), and UK (Newcastle, Cambridge). The Trial Coordinating Centre (GPPAD  
40 CC) is located at the Institute of Diabetes Research, Helmholtz Zentrum München. It manages  
41 coordination and communication between the SINT1A clinical study sites, and oversees the collection,  
42 analysis and storage of clinical data; also the supervision of regulatory activities, clinical research  
43 organization activities, the manufacturer of the active supplement, and the central laboratories is provided  
44 by the CC.  
45

46  
47 GPPAD was founded in 2015 with the aim to provide an international infrastructure to enable T1D  
48 primary prevention trials, identify infants with an elevated genetic risk of developing T1D and offer  
49  
50  
51  
52  
53

1  
2  
3 participation in randomized controlled trials aiming to reduce the incidence of T1D in children (8, 31).  
4 Until March 2021, more than 251,000 infants have been screened and had their genetic risk of developing  
5 T1D evaluated using a combination of family history and 47 single nucleotide polymorphisms (SNPs) (7).  
6 From these, over 2,000 infants have been identified as having a 10% probability or greater of developing  
7 multiple beta-cell autoantibodies by 6 years of age, making them eligible for GPPAD primary prevention  
8 trials (7). The first GPPAD trial POInT (Primary Oral Insulin Trial) has now (March/2021) completed  
9 enrollment (1,050 participants) (8). SINT1A will commence in April 2021 with the first patient first visit.  
10  
11  
12  
13  
14  
15

### 16 **Study population**

17 Infants are tested for genetic risk of T1D based on advanced risk scores derived from 51 SNPs that define  
18 HLA-DR3, HLA-DR4, and HLA-DQ8 alleles as well as SNPs from HLA class I, and non-HLA T1D  
19 susceptibility genes, and from HLA class II protective alleles, as previously described (7, 32). Infants  
20 with a predicted risk of >10% to develop multiple beta-cell autoimmunity by age 6 years and who fulfil  
21 the inclusion criteria as stated below are eligible to participate in the GPPAD-SINT1A Study.  
22  
23  
24

25 A total of 1,144 infants will be enrolled and randomized 1:1 (*B. infantis* or placebo) in the SINT1A study  
26 (see **Figure 1**). Children with T1D susceptible genotypes also have a marked risk of around 10% for  
27 autoimmunity found in celiac disease as shown in the TEDDY study (33).  
28  
29  
30

### 31 **Inclusion and exclusion criteria**

32 Participants must meet all entry criteria for the protocol as outlined below.  
33

- 34 • Infants between the ages of 7 days and 6 weeks (+14 days in case of illness or COVID-19 related  
35 issues or unexpected delay in result reporting) at the time of randomisation.
- 36 • A 10% or higher genetic risk to develop multiple beta-cell autoantibodies by age 6 years:
  - 37 a. For infants without a first-degree family history of T1D, high genetic risk is defined as a  
38 DR3/DR4-DQ8 or DR4-DQ8/DR4-DQ8 genotype and a genetic risk score that is in the  
39 upper 25th centile (>14.4) (34) or a DR3/DR4-DQ8 genotype with a GRS between the  
40 upper 50th (14.0) and 25th centile and a GG genotype at the rs3763305 SNP. These  
41 represent around 1% of all newborns.
  - 42 b. For infants with a first-degree family history of type 1 diabetes, high genetic risk is  
43 defined as having HLA DR4 and DQ8, and none of the following protective alleles:  
44 DRB1\*1501, DQB1\*0503, DRB1\*1303. These represent around 30% of infants with a  
45 first-degree family history of T1D.
- 46 • Written informed consent signed by the custodial parent(s).  
47  
48  
49  
50  
51  
52  
53  
54  
55  
56  
57  
58  
59  
60

1  
2  
3 Participants may not enter the study if ANY of the following apply:  
4

- 5 • Any medical condition, concomitant disease or treatment that may interfere with the assessments  
6 or may jeopardize the participant's safe participation in the study, as judged by the Investigators.
- 7 • Preterm delivery < 36 weeks of gestation.
- 8 • Proven immunodeficiency.
- 9 • Any condition that could be associated with poor compliance.
- 10 • Diagnosis of diabetes at the time of recruitment.
- 11
- 12
- 13
- 14
- 15

### 16 **Informed Consent**

17 The GPPAD-SINT1A Study will be described to the custodial parent(s) of potential participants by  
18 qualified GPPAD study personnel. The custodial parent(s) will have the opportunity to read the consent  
19 document and to discuss any questions concerning the consent or study participation. The families will be  
20 given enough time to consider whether or not to participate. The custodial parent(s) will then be asked to  
21 sign and date an informed consent form prior to or at the baseline visit. Date and signature of the study  
22 Investigator (or other authorized study personnel, if applicable) will also be obtained on the consent form.  
23 A copy of the informed consent form will be handed out to the families. The custodial parent(s) of the  
24 prospective participant will be told that being in the study is voluntary and that the participant may  
25 withdraw from the study at any time, for any reason.  
26  
27  
28  
29  
30  
31  
32

### 33 **Patient and Public Involvement**

34 Patients were not involved in the study design but in the prioritization of the research question of T1D  
35 prevention. Patients support recruitment through dissemination, and participation in press conferences.  
36 Participating families will be informed about the outcome of the trial via webcast, letter, and personal  
37 communication upon the completion of the trial.  
38  
39  
40  
41  
42

### 43 **Randomisation**

44 Subjects will be centrally randomised in a 1:1 ratio to one of the two intervention arms via IVRS/IWRS at  
45 the baseline visit. The participant and the treating physician and the central research team will be blinded.  
46 The study product packages will not indicate whether the content is B. infantis or placebo, but kit  
47 numbers. The IVRS/IWRS will assign the appropriate kit numbers for each participant following a  
48 randomisation list. Emergency unblinding will be available through the IVRS/helpdesk. Siblings within  
49 one household will be randomised to the same intervention arm to avoid mix-up of supplementation.  
50 Randomisation will be stratified for whether the child is still breast-fed at the date of randomization and  
51 study centre.  
52  
53  
54  
55  
56  
57

### Intervention

Participants are randomized in a 1:1 ratio to receive either *B. infantis* or placebo. Each dose of the active supplement is provided as one sachet with *B. infantis* EVC001 at a minimum concentration of  $8 \times 10^9$  colony forming units (CFU) in lactose. The dose was selected according to the previous IMPRINT study (28). The actual concentration as per batch certificate of analysis ranged from  $13.8 \times 10^9$  to  $15.8 \times 10^9$  CFU per sachet; the shelf-life is 15 months. The placebo consists of lactose, identical in appearance and taste to the active supplement. *B. infantis*/placebo will be administered orally, once a day, using single-dose sachets. It is recommended to administer the product in the morning (7-10am), preferably together with some breast-milk. The content (powder) of the sachets is poured into a small bowl and mixed with 3-5ml of breast milk, infant formula, or water. The solution will be administered using a feeding syringe, preferably in the morning. Parent(s) will be instructed in the administration and storage of the sachets (should be kept frozen until use) at or prior to their baseline visit. The genome of *B. infantis* is available in the NCBI accession number NZ\_LR655210 under the strain name USA001\_1 (35). Active and placebo products are provided by Evolve Biosystems, USA. Blinding, packing, and distribution to clinical study sites is performed by the pharmacy, University of Heidelberg, Germany.

### Study timeline

The study is expected to take 6.5 years to complete. This includes an intervention phase of 12 months, and minimum 2.5 (last participant enrolled) to maximum 5.5 years of follow-up (first participant enrolled) after intervention (Figure 1). The enrolment period is projected to be 3.0 years.

### Study assessment

The baseline visit includes the collection of information on medical history, C-section, breast-feeding, proton pump inhibitor therapy, infections, probiotic use and antibiotic treatment prior to enrolment and the collection of a stool sample. Families will be instructed in the administration and storage of the blinded food product (*B. infantis* or placebo). Mothers will be encouraged to make their best effort to maintain breastfeeding for at least the first 3-4 months, and they will be encouraged to continue breastfeeding for as long as possible during the first year of the infant's life. Two more intervention visits (visit 2 and 3) are planned after 6 months and 12 months ( $\pm 14$  days). At these visits venous blood and a stool sample is collected, electronic questionnaires are discussed. The assessment of weight and height is performed at all visits. After the intervention period, study visit 4 will be conducted at age 2 years ( $\pm 30$  days), subsequent follow-up study visits will be conducted every year ( $\pm 30$  days) until the end of the study. A detailed table explaining study visits, and data and sample collection is shown in

1  
2  
3 **Supplementary File 1.** All study relevant subject data and laboratory results are documented in  
4 corresponding electronic Case Report Forms (eCRFs).  
5  
6

### 7 **E-diaries and Allergy questionnaires**

8 Throughout the intervention period, parents will be asked to complete e-diaries fortnightly to collect  
9 information on breast-feeding, respiratory infections, antibiotic treatment and treatment with proton pump  
10 inhibitors. Additional questionnaires to obtain information about allergies will be collected every 12  
11 months starting at age 12 months  $\pm$  14 days until the end of the study. The information given by the  
12 parents will be captured in a central database and reviewed and discussed during the study visits and  
13 phone calls between the visits.  
14  
15  
16  
17  
18

### 19 **For participants who develop positive beta-cell or transglutaminase autoantibodies**

20 Participants who have confirmed positive beta-cell- or transglutaminase autoantibodies during the study  
21 are asked to donate a confirmation sample within 4-12 weeks. If the participant has persistent confirmed  
22 beta-cell autoantibodies, the custodial parent(s) are informed and asked to participate in an educational  
23 program informing about the diagnosis of beta-cell autoantibody positivity and possible symptoms of  
24 hyperglycemia and metabolic decompensation. The child remains in the study and continues to be treated  
25 or followed as planned until the child has developed T1D or end of study. Home monitoring of blood  
26 glucose will be recommended 2-monthly if a child is considered at risk for a rapid progression to diabetes  
27 (e.g. IA-2A positive, very high titers of antibodies, or impaired blood glucose values). In case of  
28 persistent confirmed positivity for transglutaminase autoantibodies, an intestinal biopsy maybe  
29 recommended to clarify the diagnosis of celiac disease. These children will continue to receive *B.*  
30 *infantis*/placebo and will be followed in the study for continued monitoring of diabetes development and  
31 safety assessments.  
32  
33  
34  
35  
36  
37  
38  
39  
40  
41

### 42 **Safety**

43 As the study intervention is not considered a medicinal product, safety reporting obligations as for IMP  
44 clinical trials do not apply. However, AEs and serious adverse events (SAEs) up to 30 days after the last  
45 administration of the food product are assessed and captured in the eCRF. Adverse events will be graded  
46 as mild, moderate, severe, life-threatening or death according to the National Cancer Institute's Common  
47 Terminology Criteria for Adverse Events (NCI-CTCAE) Version 5.0.  
48  
49

50 Physical examinations including measurement of height and weight are performed at all visits.  
51  
52  
53  
54  
55  
56  
57

## ANALYSIS

All efficacy analyses will be conducted under the Intention-To-Treat principle whereby all effectiveness outcome data in all randomised subjects who have received at least one dose of *B. infantis* supplement or placebo will be included in all analyses as appropriate. Subjects who drop-out of the study will not be replaced. All data acquired prior to termination will be included in the primary analysis unless a participant withdraws consent.

### Primary outcome and analysis

The cumulative incidence of multiple beta-cell autoantibodies over time since randomization within each treatment group will be estimated from a Kaplan-Meier estimate of the "beta-cell autoantibody-free" survival function. The difference between groups in the cumulative incidence functions, and the associated hazard functions, will be tested at the 0.05 level, two-sided, using Cox regression including site as covariate. With respect to the primary outcome, the hazard ratio of *B. infantis* to placebo will be given together with its 95% confidence interval. The final alpha is 0.05 (two-sided). In case the assumptions of the sample size estimation hold, it will be possible to reject the null hypothesis of equal hazard rates with the power of 80%, if 914 children will be uniformly randomised over 3 years and afterwards, all 914 children will be followed for another 3.5 years (6.5 years total duration after first enrollment). We have assumed a drop-out rate of 20%, and therefore we need to randomise 1,144 children to support an 80% power by a complete follow-up of 914 children ranging from 3.5 to 6.5 years.

### Sub-group analyses of Primary Outcome

It is reasonable to consider that *B. infantis* colonization, breast-feeding status, and secretor (FUT2 gene) status may impact the outcome (36, 37). *B. infantis* colonization will be measured in stool samples collected at visit age 3 months. A multiple Cox regression analysis will be performed on the primary outcome including treatment group and colonization as a continuous variable. This will also be performed with a treatment group-colonization interaction term, and with colonization as a categorical variable. Three categories representing no colonization, low and high colonization based on the distribution of values in the children will be used. Breast-feeding will be encouraged. Nevertheless, a portion of the children will not be receiving breast milk when they start. Breast-feeding will, therefore, be included as a categorical variable together with treatment in a Cox regression. An interaction analysis between colonization and breast-feeding status will be performed, and a subgroup analysis for the primary outcome will be performed in children categorized by their FUT2 gene genotype as secretors and non-secretors. Additional variables that will be analysed by multivariable Cox regression include 1. Children categorized as having a mother with diabetes versus the remainder; 2. Children who have HLA DR3/4-



1  
2  
3 DQ8 versus the remainder; 3. Children who have the T1D susceptible INS AA genotype versus the  
4 remainder; 4. Sex; 5. Caesarean section versus vaginal birth; 6. BMI at age 1 year as tertiles; 7. Genetic  
5 risk score tertiles.  
6  
7

### 8 9 **Secondary and exploratory outcomes and analyses**

10 For the secondary outcomes, the treatment arms will be compared on the corresponding incidence rates of  
11 each secondary outcome using the log rank statistic. Other secondary outcomes will be analysed by  
12 comparison between the *B. infantis* supplementation and placebo supplementation groups using  
13 appropriate statistics in dependence on the outcome of interest. Subgroup analyses analogous to those  
14 described for the beta-cell autoantibodies endpoint will be conducted on the secondary outcome  
15 endpoints. Exploratory analyses will examine the associations between *B. infantis* supplementation and  
16 allergy, mouth and stool organisms (microbiome), and blood markers such as the metabolome, lipidome,  
17 or inflammatory proteins and ancillary study measurements that specific sites may undertake.  
18  
19  
20  
21  
22  
23  
24

### 25 **Study power and accrual target**

26 For the sample size estimation, the following scenario was chosen:

- 27 • Overall alpha level = 0.05 (two-sided).
  - 28 • Overall beta level = 0.2, i.e. power = 0.8.
  - 29 • In the placebo group, at 3.5 years (approximate age of participants, 4 years), an event probability  
30 of 7.5% was assumed. Based on the exponential distribution, this leads to a hazard of 0.02227.
  - 31 • For the active treatment, it is assumed that the hazard rate will be halved.
  - 32 • Accrual time is 3 years.
  - 33 • Follow-up time is 3.5 years.
  - 34 • A dropout rate of 20% was taken into account.
- 35  
36  
37  
38  
39  
40  
41

42 The study has been designed to provide 80% power to detect a 50% risk reduction in the hazard rate of  
43 the event of confirmed persistent beta-cell autoantibodies using a two-sided test at the significance level  
44 0.05 after 6.5 years of study duration. Decisive test will be the Wald test for the hazard ratio between the  
45 two groups within a Cox PH model. It is expected that the hazard is halved by active treatment.

46 According to the assumptions described in above scenario, n=914 patients should be randomised between  
47 the two groups. With an assumed drop-out rate of 20%, n=1,144 children will need to be randomised.  
48  
49  
50  
51  
52  
53  
54  
55  
56  
57

## Benefits and Risks

### Benefits

The potential benefit for a participating child is the prevention (or delay in onset) of beta-cell autoantibodies and diabetes, celiac disease, childhood infections, and allergy. For all participating children, including children who receive placebo, testing blood samples will allow early recognition of pre-symptomatic T1D and celiac disease before the child shows the typical symptoms, and an appropriate therapy could be started immediately, potentially reducing complications later in life. Furthermore, information about other ongoing prevention trials or available treatments and intervention studies can be given to families.

### Risks

So far, there have been no reports of risks and side effects associated with the use of *B. infantis*. Several studies show that various strains of *B. infantis* have been administered to numerous newborns and especially to premature babies without complications. In breastfed babies, *B. infantis* is one of the most common bacteria found in the intestine. Typical risks or complaints associated with taking a blood sample cannot be excluded. The volume of blood drawn for the trial endpoints is <1% of the total blood volume, within the suggested limits from the European guidelines for a paediatric population (38).

A data safety monitoring board (DSMB) is established. A DSMB is an independent group of experts responsible to safeguard the well-being and safety of the study participants. The DSMB will meet six-monthly during the intervention phase and 12-monthly during the follow-up phase. Before each DSMB meeting, the DSMB will receive a report with all relevant information on recruitment rate, data completeness and safety data, including beta-cell- and transglutaminase autoantibody and diabetes outcomes.

### Retention strategies

A special family friendly retention concept has been developed to make families feel as part of the research team. Special care and support is offered for families who participate in the study and small gifts for the children are given out during the visits. Families are reminded of the advantages of study participation such as free monitoring of the children's health status and potential benefit from the intervention. Strategies for retention also include newsletters and reports on islet- and celiac autoantibody testing, and activities on community building (Homepage, Facebook groups).

Further information can be found on the GPPAD homepage:

<https://www.gppad.org/de-en/prevention-sint1a/>

## **ETHICS AND DISSEMINATION**

### **Ethics**

The study was approved by the local ethical committees and regulatory authorities of the Technische Universität München, Medical Faculty (715/20 S), the Technische Universität Dresden (SR+BO-44012021), the Medizinische Hochschule Hannover (9589\_BO\_S\_2021), the Medical University of Warsaw (KB/5/2021), EC Research UZ Leuven (322) and the Swedish ethical review authority (dnr 2021-01210).

### **Dissemination**

GPPAD is committed to sharing of data in compliance with all applicable European and GPPAD Consortium Member State, Data Protection and Privacy Protection laws, rules and regulations. Pseudonymised data of the SINT1A Study (GPPAD-04) will be available to the scientific community after the publication of the trial analysis, which is anticipated in 2028 (please visit <https://clinicaltrials.gov/>, Identifier Number: NCT04769037). The SINT1A data will be available upon request.

### **UPDATE ON THE CURRENT STATUS**

The first participant was enrolled in April 2021. By August, six study sites in Germany, Poland, Belgium and Sweden had been initiated stepwise and 78 participants have been enrolled.

## REFERENCES

1. Ziegler AG, Rewers M, Simell O et al. Seroconversion to Multiple Islet Autoantibodies and Risk of Progression to Diabetes in Children. *JAMA* 2013;.309(23):2473-9
2. Ziegler AG, Bonifacio E, BABYDIAB-BABYDIET Study Group. Age-related islet autoantibody incidence in offspring of patients with type 1 diabetes. *Diabetologia* 2012; 55(7):1937-43
3. Kimpimaki T, Kulmala P, Savola K et al. Natural history of beta-cell autoimmunity in young children with increased genetic susceptibility to type 1 diabetes recruited from the general population. *J Clin Endocrinol Metab* 2002; 87:4572-4579
4. Krischer JP, Lynch KF, Schatz DA et al., TEDDY Study Group. The 6 year incidence of diabetes-associated autoantibodies in genetically at-risk children: the TEDDY study. *Diabetologia* 2015; 58(5):980-7.
5. Hoffmann VS, Weiß A, Winkler C et al. Landmark models to define the age-adjusted risk of developing stage 1 type 1 diabetes across childhood and adolescence. *BMC Med.* 2019, 17 (125).
6. Bonifacio E, Weiß A, Winkler C et al. An Age-Related Exponential Decline in the Risk of Multiple Islet Autoantibody Seroconversion During Childhood. *Diabetes Care* 2021, dc202122.
7. Winkler C, Haupt F, Heigermoser M et al. Identification of infants with increased type 1 diabetes genetic risk for enrollment into Primary Prevention Trials—GPPAD-02 study design and first results. *Pediatr Diabetes* 2019; 20(6): 720–727.
8. Ziegler AG, Achenbach P, Berner R et al. Oral insulin therapy for primary prevention of type 1 diabetes in infants with high genetic risk: the GPPAD-POInT (global platform for the prevention of autoimmune diabetes primary oral insulin trial) study protocol. *BMJ Open.* 2019; 9(6): e028578.
9. Endesfelder D, Zu Castell W, Ardisson A, et al. (2014), Compromised gut microbiota networks in children with anti-islet cell autoimmunity. *Diabetes.* 63:2006–14
10. Vatanen T, Franzosa EA, Schwager R, et al. (2018), The human gut microbiome in early-onset type 1 diabetes from the TEDDY study. *Nature.* 562(7728):589-594
11. Uusitalo U, Liu X, Yang J, et al.; TEDDY Study Group. (2016), Association of Early Exposure of Probiotics and Islet Autoimmunity in the TEDDY Study. *JAMA Pediatr.* 170(1):20-8
12. Garcia AR, Paterou A, Lee M, et al. (2019), Peripheral tolerance to insulin is encoded by mimicry in the microbiome. <https://www.biorxiv.org/content/10.1101/2019.12.18.881433v1>
13. Hsiao KC, Ponsonby AL, Axelrad C, et al.; PPOIT Study Team (2017), Long-term clinical and immunological effects of probiotic and peanut oral immunotherapy after treatment cessation: 4-year follow-up of a randomised, double-blind, placebo-controlled trial. *Lancet Child Adolesc Health.* 1(2):97-105
14. Panigrahi P, Parida S, Nanda NC, et al. (2017), A randomized synbiotic trial to prevent sepsis among infants in rural India. *Nature.* 548(7668):407-412
15. Marino E, Richards JL, McLeod KH, et al. (2017), Gut microbial metabolites limit the frequency of autoimmune T cells and protect against type 1 diabetes. *Nat Immunol.* 18:552-562
16. Sommer F, Bäckhed F. (2013), The gut microbiota - masters of host development and physiology. *Nat Rev Microbiol.* 11(4):227-38
17. Stewart CJ, Ajami NJ, O'Brien JL, et al. (2018), Temporal development of the gut microbiome in early childhood from the TEDDY study. *Nature.* 562:583-588
18. Amenyogbe N, Kollmann TR, Ben-Othman R (2017), Early-Life Host-Microbiome Interphase: The Key Frontier for Immune Development. *Front Pediatr.* 5:111
19. Vatanen T, Kostic AD, d'Hennezel E, et al. (2016), Variation in Microbiome LPS Immunogenicity Contributes to Autoimmunity in Humans. *Cell.* 165:842-853
20. Davis-Richardson AG, Ardisson AN, Dias R, et al. (2014), *Bacteroides dorei* dominates gut microbiome prior to autoimmunity in Finnish children at high risk for type 1 diabetes. *Front Microbiol.* 10;5:678
21. Kostic AD, Gevers D, Siljander H, et al.; DIABIMMUNE Study Group, Xavier RJ. (2015), The dynamics of the human infant gut microbiome in development and in progression toward type 1 diabetes. *Cell Host Microbe.* 17(2):260-73
22. Russell JT, Roesch LFW, Ördberg M, et al. (2019), Genetic risk for autoimmunity is associated with distinct changes in the human gut microbiome. *Nat Commun.* 10(1):3621

23. Chichlowski M, Shah N, Wampler JL, et al. (2020), *Bifidobacterium longum* Subspecies *infantis* (*B. infantis*) in Pediatric Nutrition: Current State of Knowledge. *Nutrients*. 12(6):1581
24. Insel R, Knip M (2018), Prospects for primary prevention of type 1 diabetes by restoring a disappearing microbe. *Pediatr Diabetes*. 19(8):1400-1406
25. Ismail IH, Boyle RJ, Licciardi PV, et al. (2016), Early gut colonization by *Bifidobacterium breve* and *B. catenulatum* differentially modulates eczema risk in children at high risk of developing allergic disease. *Pediatr Allergy Immunol*. 27(8):838-846
26. van der Aa LB, van Aalderen WM, Heymans HS, et al.; Synbad Study Group. (2011), Synbiotics prevent asthma-like symptoms in infants with atopic dermatitis. *Allergy*. 66(2):170-7
27. Huda MN, Ahmad SM, Alam MJ, et al. (2019), *Bifidobacterium* Abundance in Early Infancy and Vaccine Response at 2 Years of Age. *Pediatrics*. 143(2):e20181489
28. Smilowitz J, Moya J, Breck M, et al. (2017), Safety and tolerability of *Bifidobacterium longum* subspecies *infantis* EVC001 supplementation in healthy term breastfed infants: A phase I clinical trial. *BMC Pediatrics*. 17
29. Frese SA, Hutton AA, Contreras LN, et al. (2017), Persistence of Supplemented *Bifidobacterium longum* subsp. *infantis* EVC001 in Breastfed Infants. *mSphere*. 2(6):e00501-17
30. Henrick BM, Chew S, Casaburi G, et al. (2019), Colonization by *B. infantis* EVC001 modulates enteric inflammation in exclusively breastfed infants. *Pediatr Res* 86, 749–757
31. Ziegler AG, Danne T, Dunger DB, et al. (2016). Primary prevention of beta-cell autoimmunity and type 1 diabetes – The Global Platform for the Prevention of Autoimmune Diabetes (GPPAD) perspectives. *Molecular Metabolism*; 5 (4), 255-262
32. Hippich M, Beyerlein A, Hagopian WA, et al. (2019), Genetic Contribution to the Divergence in Type 1 Diabetes Risk Between Children From the General Population and Children From Affected Families. *Diabetes*, 68(4): 847-857.
33. Liu E, Lee HS, Aronsson CA, et al.; TEDDY Study Group (2014), Risk of pediatric celiac disease according to HLA haplotype and country. *N Engl J Med*. 371(1):42-9
34. Bonifacio E, Beyerlein A, Hippich M et al. Genetic scores to stratify risk of developing multiple islet autoantibodies and type 1 diabetes: A prospective study in children. *PLoS Med* 2018; 15(4)
35. Duar RM, Casaburi G, Mitchell RD, et al. (2020), Comparative Genome Analysis of *Bifidobacterium longum* subsp. *infantis* Strains Reveals Variation in Human Milk Oligosaccharide Utilization Genes among Commercial Probiotics. *Nutrients*. 12, 3247
36. Smyth DJ, Cooper JD, Howson JM, Clarke P, Downes K, Mistry T, Stevens H, Walker NM, Todd JA. FUT2 nonsecretor status links type 1 diabetes susceptibility and resistance to infection. *Diabetes*. 2011 Nov;60(11):3081-4. doi: 10.2337/db11-0638.
37. Yang P, Li HL, Wang CY. FUT2 nonfunctional variant: a "missing link" between genes and environment in type 1 diabetes? *Diabetes*. 2011 Nov;60(11):2685-7. doi: 10.2337/db11-1104.
38. Online referencing [http://ec.europa.eu/health/sites/health/files/files/eudralex/vol-10/ethical\\_considerations\\_en.pdf](http://ec.europa.eu/health/sites/health/files/files/eudralex/vol-10/ethical_considerations_en.pdf) (2017, date accessed 12 June 2017)

## **GPPAD STUDY GROUP**

### **GPPAD-Coordinating Center (CC)**

Melanie Gündert, Florian Haupt, Stefanie Arnolds, Robin Assfalg, Corinna Barz, Karina Blasius, Nadine Friedl, Cigdem Gezginci, Adriano Gomez-Bantel, Joerg Hasford, Martin Heigermoser, Bianca Höfelschweiger, Manja Jolink, Nadine Klein, Ramona Lickert, Claudia Matzke, Rebecca Niewöhner, Marlon Scholz, Katharina Schütte-Borkovec, Mira Taulien, Lara Vogel, Franziska Voß, Andreas Weiß, José Maria Zapardiel Gonzalo, Philipp Siff, Heidi Kapfelsberger, Merve Vurucu, Katharina Sarcletti, Stefanie Jacobson, Yulia Grinin

**Protocol Committee:** John A. Todd, Anette-G. Ziegler (Chairs), Peter Achenbach, Stefanie Arnolds, Reinhard Berner, Ezio Bonifacio, Kristina Casteels, Markus Lundgren, Joerg Hasford, Olga Kordonouri, Marcin L. Pekalski, Matthew Snape, Agnieszka Szypowska

**Medical Monitor:** Katharina Warncke

**Eligibility Committee:** Ezio Bonifacio, Joerg Hasford, John A Todd

**Outcome Committee:** Peter Achenbach, Ezio Bonifacio

**Type 1 diabetes endpoint committee:** Helena Elding Larsson, Peter Achenbach, Olga Kordonouri, Ezio Bonifacio, Anette G. Ziegler

### **Belgium Clinical Center**

Kristina Casteels, Annre Rochtus, An Jacobs, Hilde Morobé, Jasmin Paulus, Bronté Vrancken, Natalie Van den Driessche, Renka Van Heyste, Janne Houben, Veerle Vanhuysse

### **Germany, Dresden Clinical Center**

Ezio Bonifacio, Reinhard Berner, Sevina Dietz, Gita Gemulla, Manja Gottschalk-Schwarz, Sophie Heinke, Angela Hommel, Susann Kowal, Fabian Lander, Robert Morgenstern, Marc Weigelt, Nicole Zubizarreta, Sari Arabi, Raphael Hoffmann, Ruth Blechschmidt, Franziska Ehrlich, Anja Löff

### **Germany, Hanover Clinical Center**

Olga Kordonouri, Thomas Danne, Laura Galuschka, Ute Holtkamp, Nils Janzen, Sarah Landsberg, Karin Lange, Erika Marquardt, Felix Reschke, Frank Roloff, Kerstin Semler, Thekla von dem Berge

### **Germany, Munich Clinical Center**

Anette G. Ziegler, Peter Achenbach, Melanie Bunk, Simone Färber-Meisterjahn, Willi Grätz, Ines Greif, Melanie Herbst, Anna Hofelich, Annika Kölln, Benjamin Marcus, Annette Munzinger, Jasmin Ohli, Claudia Ramminger, Franziska Reinmüller, Tiziana Welzhofer, Christiane Winkler

### **Poland Clinical Center**

Agnieszka Szypowska, Mariusz Ołtarzewski, Sylwia Dybkowska, Katarzyna Dzygało, Lidia Groele, Dorota Owczarek, Katarzyna Popko, Agnieszka Skrobot, Anna Taczanowska, Beata Zduńczyk

### **Sweden Clinical Center**

Helena Elding Larsson, Markus Lundgren, Åke Lernmark, Daniel Agardh, Carin Andrén Aronsson, Rasmus Bennet, Charlotte Brundin, Lina Fransson, Ida Jönsson, Sara Maroufkhani, Zeliha Mestan, Caroline Nilsson, Anita Ramelius, Evelyn Tekum Amboh, Carina Törn

### **UK, Cambridge Clinical Center**

Loredana Marcovecchio, Katarzyna Gajewska-Knapik, Sarah Hogg, Elena Romero, Suzannah Twiss

### **UK, Newcastle Clinical Center**

Catherine Owen, Helen Gallon, Laura Gebbie, Fiona Jenkinson, Steven Pratt, Steve Robson, Claire Simmister, Evelyn Thomson, Eileen Walton, Andrew Johnston

## **ACKNOWLEDGMENT**

We highly acknowledge the following support:

**Data Safety and Monitoring Board:** Polly Bingley (University of Bristol, Bristol, UK), Ulrich Heininger (Division of Paediatric Infectious Diseases and Vaccinology, University Children's Hospital, Basel, Switzerland), Markus Pfirrmann (Institut für Medizinische Informationsverarbeitung, Biometrie und Epidemiologie (IBE), Ludwig-Maximilians-Universität, Munich, Germany), Wolfgang Rascher (Department of Pediatrics and Adolescent Medicine, Erlangen, Germany), Paul Turner (Nuffield Department of Medicine, Medical Science Division, Oxford, UK)

**Beta-cell autoantibody laboratories:**

Institute of Diabetes Research, Helmholtz Zentrum München, Munich, Germany

Bristol Medical School, The University of Bristol, Bristol, UK

**Genotyping Laboratory:**

Grace London, LGC Ltd., Hertfordshire, UK

**Study management/monitoring:**

Helmholtz Zentrum München, Neuherberg, Germany

**Database and electronic questionnaires:**

PHARMALOG GmbH, Ismaning, Germany

**Study product:**

Evolve BioSystems, Inc., Davis, CA, USA

**Study pharmacy:**

Pharmacy of the University Hospital of Heidelberg, Germany

**Biorepository:**

Integrated BioBank of Luxembourg (IBBL), Dudelange, Luxembourg

We thank participating families for their participation in type 1 diabetes research and for helping to develop therapies for prevention.

**Authors' contributions:**

AGZ, MLP and JAT conceived the study, and led the protocol team. All authors (AGZ, SA, AK, PA, RB, EB, KC, HEL, MG, JH, OK, ML, MO, MLP, MP, MDS, AS, JAT) contributed to protocol development. EB, JH, and MP developed the statistical design for the study and wrote the statistical section of the protocol. EB and PA developed the outcome definition of the trial and wrote the autoantibody and outcome section of the protocol. AGZ, SA, AK, and MG drafted the manuscript. All authors reviewed the protocol as well as this manuscript.

**Funding**

The SINT1A study is supported by The Leona M. and Harry B. Helmsley Charitable Trust (Helmsley) Grants #2007-04031 ("The GPPAD-04 study: Supplementation with B. Infantis for Mitigation of Type 1 Diabetes Autoimmunity (SINT1A)"), and by the Helmholtz Zentrum München, Germany. The BMBF trial grant FKZ: 01KX1818 supported advanced genetic risk assessment and trial protocol development phase. The German Clinical Centers Munich and Dresden are also supported by the Deutsches Zentrum für Diabetesforschung DZD. Funding organizations had no role in the design of the trial.

**Competing interests**

JAT is a member of the Scientific Advisory Board of Precion Ltd and of the Human Genetics Advisory Board of GSK.

**Figure 1:** SINT1A Study flow and time schedule for a participant with intervention until 12 months and maximum follow-up of 5.5 years.

**Supplementary File 1:** GPPAD-SINT1A Study: Visit–schedule (Study Flow Chart)

**General population**

DR3/DR4-DQ8 or DR4-DQ8/DR4-DQ8  
and GRS>14.4 or DR3/DR4-DQ8 and GRS = 14.0  
and GG at the rs3763305 SNP

**First degree family history**

DR4-DQ8/x\*  
\*not DRB1\*1501, DQB1\*0503 or DRB1\*1303

Randomisation 1:1 (n=1,144)

Activated B. infantis EVC001

Placebo

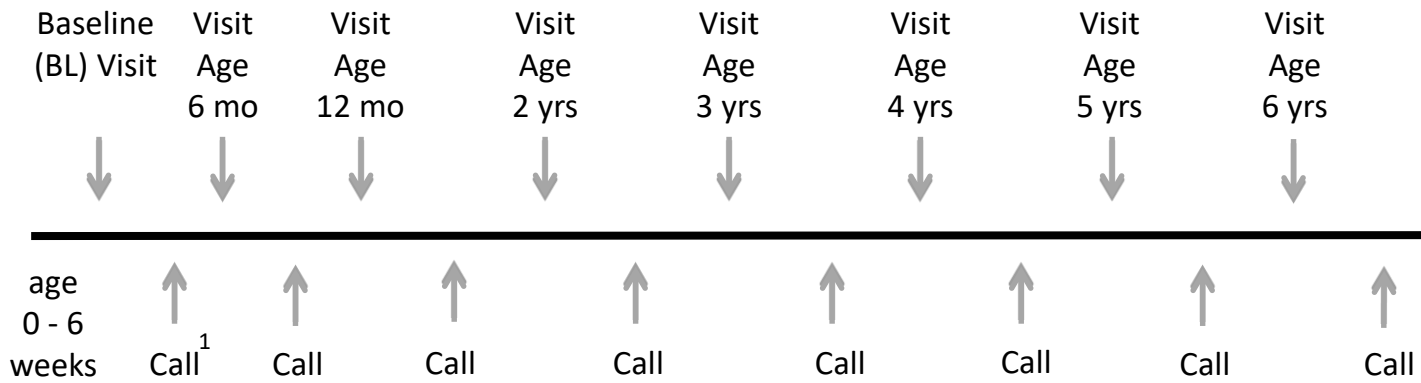

**Primary outcome:** Persistent confirmed multiple beta-cell autoantibodies

**Secondary outcomes:** Any persistent confirmed beta-cell autoantibody, diabetes, transglutaminase antibodies, respiratory infection rate, safety

**Exploratory outcomes:** Allergy, antibody response to vaccines, alterations of the gut microbiome or blood metabolome, stool pH and calprotectin

<sup>1</sup> interim telephone calls with families to assess AEs and support trial adherence

1  
2  
3  
4  
5  
6  
7  
8  
9  
10  
11  
12  
13  
14  
15  
16  
17  
18  
19  
20  
21  
22  
23  
24  
25  
26  
27  
28  
29  
30  
31  
32  
33  
34  
35  
36  
37  
38  
39  
40  
41



## Supplementation with *Bifidobacteria longum* subspecies *infantis* EVC001 for mitigation of type 1 diabetes autoimmunity - The GPPAD-SINT1A randomized controlled trial protocol

Anette-Gabriele Ziegler, Stefanie Arnolds, Annika Kölln, Peter Achenbach, Reinhard Berner, Ezio Bonifacio, Kristina Casteels, Helena Elding Larsson, Melanie Gündert, Joerg Hasford, Olga Kordonouri, Markus Lundgren, Mariusz Oltarzewski, Marcin L. Pekalski, Markus Pfirrmann, Matthew D. Snape, Agnieszka Szypowska, John A. Todd and the GPPAD Study group

### Supplementary File 1: GPPAD-SINT1A Study: Visit-schedule (Study Flow Chart)

| Visits                                                                                                                   | Intervention                              |                            |                       |                         |                        |
|--------------------------------------------------------------------------------------------------------------------------|-------------------------------------------|----------------------------|-----------------------|-------------------------|------------------------|
|                                                                                                                          | Baseline Visit<br>age 7 days - 6<br>weeks | Call<br>age<br>3month<br>s | Visit<br>age 6 months | Call<br>age 9<br>months | Visit<br>age 12 months |
| Visit window                                                                                                             | +14d                                      | - 14d                      | ± 14d                 | ± 14d                   | + 14d                  |
| Study visit                                                                                                              | 1                                         |                            | 2                     |                         | 3                      |
| Study call                                                                                                               |                                           | 1                          |                       | 2                       |                        |
| Informed consent,<br>Review Incl./Excl. Criteria                                                                         | X                                         |                            |                       |                         |                        |
| Randomization                                                                                                            | X                                         |                            |                       |                         |                        |
| Medical History                                                                                                          | X                                         |                            |                       |                         |                        |
| <b>Intervention</b>                                                                                                      |                                           |                            |                       |                         |                        |
| Dispense supplement and compliance<br>data sheet ( <i>do not administer supplement<br/>at study site, only at home</i> ) | X                                         |                            | X                     |                         |                        |
| <b>Local investigations &amp; measurements</b>                                                                           |                                           |                            |                       |                         |                        |
| Physical examination<br>(height, weight)                                                                                 | X                                         |                            | X                     |                         | X                      |
| Assessment of AEs and SAEs <sup>A</sup>                                                                                  |                                           | X                          | X                     | X                       | X                      |
| Assessment of rotavirus and MMR<br>vaccination schedule using official<br>records                                        |                                           |                            | X                     |                         | X                      |
| Blood glucose <sup>B</sup>                                                                                               |                                           |                            | X                     |                         | X                      |
| HbA1c                                                                                                                    |                                           |                            |                       |                         | X                      |
| <b>Sample collection</b>                                                                                                 |                                           |                            |                       |                         |                        |
| <200 µl capillary or venous blood for<br>glucose                                                                         |                                           |                            | X                     |                         | X                      |
| < 1ml EDTA blood for HbA1c                                                                                               |                                           |                            |                       |                         | X                      |
| 2ml blood for serum samples for central<br>antibody measurement <sup>C, D</sup>                                          |                                           |                            | X                     |                         | X                      |
| 2ml EDTA blood for plasma samples for<br>mechanistic studies<br>(inflammation, metabolomics)                             |                                           |                            | X                     |                         | X                      |
| 2 ml EDTA blood for DNA sample <sup>C</sup>                                                                              |                                           |                            |                       |                         | X                      |

| Visits                                                                 | Intervention                              |                            |                       |                         |                        |
|------------------------------------------------------------------------|-------------------------------------------|----------------------------|-----------------------|-------------------------|------------------------|
|                                                                        | Baseline Visit<br>age 7 days - 6<br>weeks | Call<br>age<br>3month<br>s | Visit<br>age 6 months | Call<br>age 9<br>months | Visit<br>age 12 months |
| Stool sample for microbiome 16S                                        | X                                         | X                          | X                     |                         | X                      |
| Stool sample for colonization                                          |                                           | x                          |                       |                         |                        |
| Stool sample for stool pH & calprotectin<br>(in selected participants) |                                           |                            | X                     |                         |                        |

| Central measurements                                             |                                   |   |   |  |   |
|------------------------------------------------------------------|-----------------------------------|---|---|--|---|
| IAA; GADA; IA-2A; ZnT8RA; ZnT8WA                                 |                                   |   | X |  | X |
| TGA                                                              |                                   |   | X |  | X |
| Stool PCR for B. infantis colonization                           |                                   | X |   |  |   |
| Antibody responses to rotavirus vaccine                          |                                   |   | X |  |   |
| Microbiome 16s <sup>E</sup>                                      | X                                 | X |   |  | X |
| Mechanistic markers<br>(inflammation, metabolomics) <sup>E</sup> |                                   |   | X |  | X |
| Electronic questionnaires completed by families                  |                                   |   |   |  |   |
| Questionnaire about breast-feeding and antibiotics               | every 2 weeks until age 12 months |   |   |  |   |
| Questionnaire about infections and vaccinations                  | every 2 weeks until age 12 months |   |   |  |   |
| Questionnaire about allergies                                    |                                   |   |   |  | X |
| Ancillary assessments                                            |                                   |   |   |  |   |
| Whole blood FACS <sup>F</sup><br>(Dresden and Munich only)       |                                   |   | X |  | X |

<sup>A</sup> AEs/SAEs will be noted and reported as under intervention phase for 30 days after end of treatment day

<sup>B</sup> by handmeter or haemocue

<sup>C</sup> if there is left over material and a signed biobank consent, the left over serum and DNA will be stored in the IBBL or local biobank

<sup>D</sup> venous or capillary blood for the AAB confirmation sample can be obtained by a local physician

<sup>E</sup> measurements may partly be done as exploratory project after unblinding and analysis of main outcomes

<sup>F</sup> to assess maturation of immune cell composition and response

|                                                                                 | Follow-up<br>(minimum 2.5 years; maximum up to 5.5 years after end of intervention) |                      |                                                               |                                          |
|---------------------------------------------------------------------------------|-------------------------------------------------------------------------------------|----------------------|---------------------------------------------------------------|------------------------------------------|
|                                                                                 | Call<br>age 18 months                                                               | Visit<br>age 2 years | Call<br>every 12 month<br>(in the middle of<br>yearly visits) | Visit<br>every 12<br>months <sup>G</sup> |
| <b>Visits</b>                                                                   |                                                                                     |                      |                                                               |                                          |
| Visit window                                                                    | ± 30d                                                                               | ± 30d                | ± 30d                                                         | ± 30d                                    |
| Study visit                                                                     |                                                                                     | 4                    |                                                               | 5+                                       |
| Study call                                                                      | 3                                                                                   |                      | 4+                                                            |                                          |
| <b>Local investigations and measurements</b>                                    |                                                                                     |                      |                                                               |                                          |
| Physical examination<br>(height, weight)                                        |                                                                                     | X                    |                                                               | X                                        |
| Assessment of AEs and SAEs <sup>A</sup>                                         | X                                                                                   |                      |                                                               |                                          |
| Assessment of MMR vaccination schedule using<br>official records                |                                                                                     | X                    |                                                               |                                          |
| Blood glucose <sup>B</sup>                                                      |                                                                                     | X                    |                                                               | X                                        |
| <b>Sample collection</b>                                                        |                                                                                     |                      |                                                               |                                          |
| <200 µl capillary or venous blood for glucose                                   |                                                                                     | X                    |                                                               | X                                        |
| 2ml blood for serum samples for central<br>antibody measurement <sup>C, D</sup> |                                                                                     | X                    |                                                               | X                                        |
| 2ml EDTA blood for plasma samples for<br>mechanistic studies (inflammation)     |                                                                                     | X                    |                                                               |                                          |
| <b>Central measurements</b>                                                     |                                                                                     |                      |                                                               |                                          |
| IAA; GADA; IA-2A; ZnT8RA; ZnT8WA                                                |                                                                                     | X                    |                                                               | X                                        |
| TGA                                                                             |                                                                                     | X                    |                                                               | X                                        |
| Antibody Responses to MMR vaccine                                               |                                                                                     | X                    |                                                               |                                          |
| Mechanistic markers (inflammation) <sup>E</sup>                                 |                                                                                     | X                    |                                                               |                                          |
| <b>Electronic questionnaires completed by families</b>                          |                                                                                     |                      |                                                               |                                          |
| Questionnaire about allergies                                                   | every 12 months until end of study                                                  |                      |                                                               |                                          |
| <b>Ancillary assessments</b>                                                    |                                                                                     |                      |                                                               |                                          |
| Whole blood FACS ( <i>Dresden and Munich only</i> )                             |                                                                                     | X                    |                                                               |                                          |

<sup>A</sup> AEs/SAEs will be noted and reported as under intervention phase for 30 days after end of treatment day

<sup>B</sup> by handmeter or haemocue

<sup>C</sup> if there is left over material and a signed biobank consent, the left over serum and DNA will be stored in the IBBL or local biobank

<sup>D</sup> venous or capillary blood for the AAB confirmation sample can be obtained by a local physician

<sup>E</sup> measurements may partly be done as exploratory project after unblinding and analysis of main outcomes

<sup>F</sup> to assess maturation of immune cell composition and response

<sup>G</sup> Final visit must be performed within the last 6 months before last enrolled child completed 2.5 years of follow-up

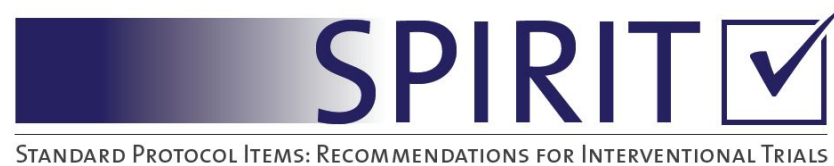

SPIRIT 2013 Checklist: Recommended items to address in a clinical trial protocol and related documents\*

| Section/item                      | Item No | Description                                                                                                                                                                                                                                                                              | Addressed on page number |
|-----------------------------------|---------|------------------------------------------------------------------------------------------------------------------------------------------------------------------------------------------------------------------------------------------------------------------------------------------|--------------------------|
| <b>Administrative information</b> |         |                                                                                                                                                                                                                                                                                          |                          |
| Title                             | 1       | Descriptive title identifying the study design, population, interventions, and, if applicable, trial acronym                                                                                                                                                                             | __ 1 __                  |
| Trial registration                | 2a      | Trial identifier and registry name. If not yet registered, name of intended registry                                                                                                                                                                                                     | __ 3 __                  |
|                                   | 2b      | All items from the World Health Organization Trial Registration Data Set                                                                                                                                                                                                                 | __ 3 __                  |
| Protocol version                  | 3       | Date and version identifier                                                                                                                                                                                                                                                              | __ 2 __                  |
| Funding                           | 4       | Sources and types of financial, material, and other support                                                                                                                                                                                                                              | __ 21 __                 |
| Roles and responsibilities        | 5a      | Names, affiliations, and roles of protocol contributors                                                                                                                                                                                                                                  | __ 19 __                 |
|                                   | 5b      | Name and contact information for the trial sponsor                                                                                                                                                                                                                                       | __ NA __                 |
|                                   | 5c      | Role of study sponsor and funders, if any, in study design; collection, management, analysis, and interpretation of data; writing of the report; and the decision to submit the report for publication, including whether they will have ultimate authority over any of these activities | __ 9, 20 __              |
|                                   | 5d      | Composition, roles, and responsibilities of the coordinating centre, steering committee, endpoint adjudication committee, data management team, and other individuals or groups overseeing the trial, if applicable (see Item 21a for data monitoring committee)                         | __ 9, 19, 20, 21 __      |

1 **Introduction**

2

3 Background and 6a Description of research question and justification for undertaking the trial, including summary of relevant \_\_\_5, 6, 7\_\_\_

4 rationale studies (published and unpublished) examining benefits and harms for each intervention

5

6 6b Explanation for choice of comparators \_\_\_6, 7\_\_\_

7

8 Objectives 7 Specific objectives or hypotheses \_\_\_7, 8\_\_\_

9

10 Trial design 8 Description of trial design including type of trial (eg, parallel group, crossover, factorial, single group),

11 allocation ratio, and framework (eg, superiority, equivalence, noninferiority, exploratory) \_\_\_9\_\_\_

12

13

14 **Methods: Participants, interventions, and outcomes**

15

16 Study setting 9 Description of study settings (eg, community clinic, academic hospital) and list of countries where data will \_\_\_9, 10\_\_\_

17 be collected. Reference to where list of study sites can be obtained

18

19 Eligibility criteria 10 Inclusion and exclusion criteria for participants. If applicable, eligibility criteria for study centres and \_\_\_10, 11\_\_\_

20 individuals who will perform the interventions (eg, surgeons, psychotherapists)

21

22 Interventions 11a Interventions for each group with sufficient detail to allow replication, including how and when they will be \_\_\_12\_\_\_

23 administered

24

25 11b Criteria for discontinuing or modifying allocated interventions for a given trial participant (eg, drug dose \_\_\_13\_\_\_

26 change in response to harms, participant request, or improving/worsening disease)

27

28 11c Strategies to improve adherence to intervention protocols, and any procedures for monitoring adherence \_\_\_12, 13\_\_\_

29 (eg, drug tablet return, laboratory tests)

30

31 11d Relevant concomitant care and interventions that are permitted or prohibited during the trial \_\_\_NA\_\_\_

32

33

34 Outcomes 12 Primary, secondary, and other outcomes, including the specific measurement variable (eg, systolic blood \_\_\_7, 8, 9\_\_\_

35 pressure), analysis metric (eg, change from baseline, final value, time to event), method of aggregation

36 (eg, median, proportion), and time point for each outcome. Explanation of the clinical relevance of chosen

37 efficacy and harm outcomes is strongly recommended

38

39

40 Participant timeline 13 Time schedule of enrolment, interventions (including any run-ins and washouts), assessments, and visits Fig 1, Suppl file 1

41 for participants. A schematic diagram is highly recommended (see Figure)

42

43

44

45

46

|   |             |    |                                                                                                                                                                                       |                |
|---|-------------|----|---------------------------------------------------------------------------------------------------------------------------------------------------------------------------------------|----------------|
| 1 | Sample size | 14 | Estimated number of participants needed to achieve study objectives and how it was determined, including clinical and statistical assumptions supporting any sample size calculations | _____ 15 _____ |
| 2 |             |    |                                                                                                                                                                                       |                |
| 3 |             |    |                                                                                                                                                                                       |                |
| 4 | Recruitment | 15 | Strategies for achieving adequate participant enrolment to reach target sample size                                                                                                   | _____ 10 _____ |
| 5 |             |    |                                                                                                                                                                                       |                |

### 6 **Methods: Assignment of interventions (for controlled trials)**

#### 7 Allocation:

|    |                    |     |                                                                                                                                                                                                                                                                                                                                                          |                |
|----|--------------------|-----|----------------------------------------------------------------------------------------------------------------------------------------------------------------------------------------------------------------------------------------------------------------------------------------------------------------------------------------------------------|----------------|
| 8  |                    |     |                                                                                                                                                                                                                                                                                                                                                          |                |
| 9  |                    |     |                                                                                                                                                                                                                                                                                                                                                          |                |
| 10 | Sequence           | 16a | Method of generating the allocation sequence (eg, computer-generated random numbers), and list of any factors for stratification. To reduce predictability of a random sequence, details of any planned restriction (eg, blocking) should be provided in a separate document that is unavailable to those who enrol participants or assign interventions | _____ 11 _____ |
| 11 | generation         |     |                                                                                                                                                                                                                                                                                                                                                          |                |
| 12 |                    |     |                                                                                                                                                                                                                                                                                                                                                          |                |
| 13 |                    |     |                                                                                                                                                                                                                                                                                                                                                          |                |
| 14 |                    |     |                                                                                                                                                                                                                                                                                                                                                          |                |
| 15 |                    |     |                                                                                                                                                                                                                                                                                                                                                          |                |
| 16 | Allocation         | 16b | Mechanism of implementing the allocation sequence (eg, central telephone; sequentially numbered, opaque, sealed envelopes), describing any steps to conceal the sequence until interventions are assigned                                                                                                                                                | _____ 11 _____ |
| 17 | concealment        |     |                                                                                                                                                                                                                                                                                                                                                          |                |
| 18 | mechanism          |     |                                                                                                                                                                                                                                                                                                                                                          |                |
| 19 |                    |     |                                                                                                                                                                                                                                                                                                                                                          |                |
| 20 | Implementation     | 16c | Who will generate the allocation sequence, who will enrol participants, and who will assign participants to interventions                                                                                                                                                                                                                                | _____ 11 _____ |
| 21 |                    |     |                                                                                                                                                                                                                                                                                                                                                          |                |
| 22 |                    |     |                                                                                                                                                                                                                                                                                                                                                          |                |
| 23 |                    |     |                                                                                                                                                                                                                                                                                                                                                          |                |
| 24 | Blinding (masking) | 17a | Who will be blinded after assignment to interventions (eg, trial participants, care providers, outcome assessors, data analysts), and how                                                                                                                                                                                                                | _____ 11 _____ |
| 25 |                    |     |                                                                                                                                                                                                                                                                                                                                                          |                |
| 26 |                    |     |                                                                                                                                                                                                                                                                                                                                                          |                |
| 27 |                    | 17b | If blinded, circumstances under which unblinding is permissible, and procedure for revealing a participant's allocated intervention during the trial                                                                                                                                                                                                     | _____ 11 _____ |
| 28 |                    |     |                                                                                                                                                                                                                                                                                                                                                          |                |
| 29 |                    |     |                                                                                                                                                                                                                                                                                                                                                          |                |
| 30 |                    |     |                                                                                                                                                                                                                                                                                                                                                          |                |

### 31 **Methods: Data collection, management, and analysis**

|    |                 |     |                                                                                                                                                                                                                                                                                                                                                                                                              |                |
|----|-----------------|-----|--------------------------------------------------------------------------------------------------------------------------------------------------------------------------------------------------------------------------------------------------------------------------------------------------------------------------------------------------------------------------------------------------------------|----------------|
| 32 |                 |     |                                                                                                                                                                                                                                                                                                                                                                                                              |                |
| 33 | Data collection | 18a | Plans for assessment and collection of outcome, baseline, and other trial data, including any related processes to promote data quality (eg, duplicate measurements, training of assessors) and a description of study instruments (eg, questionnaires, laboratory tests) along with their reliability and validity, if known. Reference to where data collection forms can be found, if not in the protocol | 12, 13, 14, 15 |
| 34 | methods         |     |                                                                                                                                                                                                                                                                                                                                                                                                              |                |
| 35 |                 |     |                                                                                                                                                                                                                                                                                                                                                                                                              |                |
| 36 |                 |     |                                                                                                                                                                                                                                                                                                                                                                                                              |                |
| 37 |                 |     |                                                                                                                                                                                                                                                                                                                                                                                                              |                |
| 38 |                 | 18b | Plans to promote participant retention and complete follow-up, including list of any outcome data to be collected for participants who discontinue or deviate from intervention protocols                                                                                                                                                                                                                    | _____ 16 _____ |
| 39 |                 |     |                                                                                                                                                                                                                                                                                                                                                                                                              |                |
| 40 |                 |     |                                                                                                                                                                                                                                                                                                                                                                                                              |                |
| 41 |                 |     |                                                                                                                                                                                                                                                                                                                                                                                                              |                |
| 42 |                 |     |                                                                                                                                                                                                                                                                                                                                                                                                              |                |

1 Data management 19 Plans for data entry, coding, security, and storage, including any related processes to promote data quality \_\_\_ 13, 14 \_\_\_  
 2 (eg, double data entry; range checks for data values). Reference to where details of data management  
 3 procedures can be found, if not in the protocol  
 4  
 5 Statistical methods 20a Statistical methods for analysing primary and secondary outcomes. Reference to where other details of the \_\_\_ 14, 15 \_\_\_  
 6 statistical analysis plan can be found, if not in the protocol  
 7  
 8 20b Methods for any additional analyses (eg, subgroup and adjusted analyses) \_\_\_ 14, 15 \_\_\_  
 9  
 10 20c Definition of analysis population relating to protocol non-adherence (eg, as randomised analysis), and any  
 11 statistical methods to handle missing data (eg, multiple imputation) \_\_\_ NA \_\_\_  
 12  
 13

14 **Methods: Monitoring**

15  
 16 Data monitoring 21a Composition of data monitoring committee (DMC); summary of its role and reporting structure; statement of \_\_\_ 20, 21 \_\_\_  
 17 whether it is independent from the sponsor and competing interests; and reference to where further details  
 18 about its charter can be found, if not in the protocol. Alternatively, an explanation of why a DMC is not  
 19 needed  
 20  
 21 21b Description of any interim analyses and stopping guidelines, including who will have access to these \_\_\_ NA \_\_\_  
 22 interim results and make the final decision to terminate the trial  
 23  
 24  
 25 Harms 22 Plans for collecting, assessing, reporting, and managing solicited and spontaneously reported adverse \_\_\_ 13 \_\_\_  
 26 events and other unintended effects of trial interventions or trial conduct  
 27  
 28 Auditing 23 Frequency and procedures for auditing trial conduct, if any, and whether the process will be independent \_\_\_ NA \_\_\_  
 29 from investigators and the sponsor  
 30  
 31

32 **Ethics and dissemination**

33  
 34 Research ethics 24 Plans for seeking research ethics committee/institutional review board (REC/IRB) approval \_\_\_ 17 \_\_\_  
 35 approval  
 36  
 37 Protocol 25 Plans for communicating important protocol modifications (eg, changes to eligibility criteria, outcomes, \_\_\_ 20 \_\_\_  
 38 amendments analyses) to relevant parties (eg, investigators, REC/IRBs, trial participants, trial registries, journals,  
 39 regulators)  
 40  
 41  
 42  
 43  
 44  
 45  
 46

|    |                               |     |                                                                                                                                                                                                                                                                                     |                  |
|----|-------------------------------|-----|-------------------------------------------------------------------------------------------------------------------------------------------------------------------------------------------------------------------------------------------------------------------------------------|------------------|
| 1  | Consent or assent             | 26a | Who will obtain informed consent or assent from potential trial participants or authorised surrogates, and how (see Item 32)                                                                                                                                                        | ___ 11 ___       |
| 2  |                               |     |                                                                                                                                                                                                                                                                                     |                  |
| 3  |                               |     |                                                                                                                                                                                                                                                                                     |                  |
| 4  |                               | 26b | Additional consent provisions for collection and use of participant data and biological specimens in ancillary studies, if applicable                                                                                                                                               | ___ 11 ___       |
| 5  |                               |     |                                                                                                                                                                                                                                                                                     |                  |
| 6  |                               |     |                                                                                                                                                                                                                                                                                     |                  |
| 7  | Confidentiality               | 27  | How personal information about potential and enrolled participants will be collected, shared, and maintained in order to protect confidentiality before, during, and after the trial                                                                                                | ___ 11, 12 ___   |
| 8  |                               |     |                                                                                                                                                                                                                                                                                     |                  |
| 9  |                               |     |                                                                                                                                                                                                                                                                                     |                  |
| 10 | Declaration of interests      | 28  | Financial and other competing interests for principal investigators for the overall trial and each study site                                                                                                                                                                       | ___ 21 ___       |
| 11 |                               |     |                                                                                                                                                                                                                                                                                     |                  |
| 12 |                               |     |                                                                                                                                                                                                                                                                                     |                  |
| 13 | Access to data                | 29  | Statement of who will have access to the final trial dataset, and disclosure of contractual agreements that limit such access for investigators                                                                                                                                     | ___ 17 ___       |
| 14 |                               |     |                                                                                                                                                                                                                                                                                     |                  |
| 15 |                               |     |                                                                                                                                                                                                                                                                                     |                  |
| 16 | Ancillary and post-trial care | 30  | Provisions, if any, for ancillary and post-trial care, and for compensation to those who suffer harm from trial participation                                                                                                                                                       | ___ NA ___       |
| 17 |                               |     |                                                                                                                                                                                                                                                                                     |                  |
| 18 |                               |     |                                                                                                                                                                                                                                                                                     |                  |
| 19 |                               |     |                                                                                                                                                                                                                                                                                     |                  |
| 20 | Dissemination policy          | 31a | Plans for investigators and sponsor to communicate trial results to participants, healthcare professionals, the public, and other relevant groups (eg, via publication, reporting in results databases, or other data sharing arrangements), including any publication restrictions | ___ 17 ___       |
| 21 |                               |     |                                                                                                                                                                                                                                                                                     |                  |
| 22 |                               |     |                                                                                                                                                                                                                                                                                     |                  |
| 23 |                               |     |                                                                                                                                                                                                                                                                                     |                  |
| 24 |                               | 31b | Authorship eligibility guidelines and any intended use of professional writers                                                                                                                                                                                                      | ___ NA ___       |
| 25 |                               |     |                                                                                                                                                                                                                                                                                     |                  |
| 26 |                               | 31c | Plans, if any, for granting public access to the full protocol, participant-level dataset, and statistical code                                                                                                                                                                     | ___ 17 ___       |
| 27 |                               |     |                                                                                                                                                                                                                                                                                     |                  |
| 28 |                               |     |                                                                                                                                                                                                                                                                                     |                  |
| 29 | <b>Appendices</b>             |     |                                                                                                                                                                                                                                                                                     |                  |
| 30 |                               |     |                                                                                                                                                                                                                                                                                     |                  |
| 31 | Informed consent materials    | 32  | Model consent form and other related documentation given to participants and authorised surrogates                                                                                                                                                                                  | ___ attached ___ |
| 32 |                               |     |                                                                                                                                                                                                                                                                                     |                  |
| 33 |                               |     |                                                                                                                                                                                                                                                                                     |                  |
| 34 | Biological specimens          | 33  | Plans for collection, laboratory evaluation, and storage of biological specimens for genetic or molecular analysis in the current trial and for future use in ancillary studies, if applicable                                                                                      | ___ 17 ___       |
| 35 |                               |     |                                                                                                                                                                                                                                                                                     |                  |
| 36 |                               |     |                                                                                                                                                                                                                                                                                     |                  |

\*It is strongly recommended that this checklist be read in conjunction with the SPIRIT 2013 Explanation & Elaboration for important clarification on the items. Amendments to the protocol should be tracked and dated. The SPIRIT checklist is copyrighted by the SPIRIT Group under the Creative Commons [“Attribution-NonCommercial-NoDerivs 3.0 Unported”](https://creativecommons.org/licenses/by-nc-nd/3.0/) license.



## PRISMA-P 2015 Checklist

This checklist has been adapted for use with protocol submissions to *Systematic Reviews* from Table 3 in Moher D et al: Preferred reporting items for systematic review and meta-analysis protocols (PRISMA-P) 2015 statement. *Systematic Reviews* 2015 4:1

| Section/topic                     | #  | Checklist item                                                                                                                                                                                  | Information reported     |                          | Page number(s)                                                          |
|-----------------------------------|----|-------------------------------------------------------------------------------------------------------------------------------------------------------------------------------------------------|--------------------------|--------------------------|-------------------------------------------------------------------------|
|                                   |    |                                                                                                                                                                                                 | Yes                      | No                       |                                                                         |
| <b>ADMINISTRATIVE INFORMATION</b> |    |                                                                                                                                                                                                 |                          |                          |                                                                         |
| <b>Title</b>                      |    |                                                                                                                                                                                                 |                          |                          |                                                                         |
| Identification                    | 1a | Identify the report as a protocol of a systematic review                                                                                                                                        | x                        | <input type="checkbox"/> | Title                                                                   |
| Update                            | 1b | If the protocol is for an update of a previous systematic review, identify as such                                                                                                              | <input type="checkbox"/> | <input type="checkbox"/> | Not applicable                                                          |
| <b>Registration</b>               | 2  | If registered, provide the name of the registry (e.g., PROSPERO) and registration number in the Abstract                                                                                        | x                        | <input type="checkbox"/> | End of Abstract, page 3                                                 |
| <b>Authors</b>                    |    |                                                                                                                                                                                                 |                          |                          |                                                                         |
| Contact                           | 3a | Provide name, institutional affiliation, and e-mail address of all protocol authors; provide physical mailing address of corresponding author                                                   | x                        | <input type="checkbox"/> | Title page                                                              |
| Contributions                     | 3b | Describe contributions of protocol authors and identify the guarantor of the review                                                                                                             | x                        | <input type="checkbox"/> | Authors' contributions, page 17,18                                      |
| <b>Amendments</b>                 | 4  | If the protocol represents an amendment of a previously completed or published protocol, identify as such and list changes; otherwise, state plan for documenting important protocol amendments | <input type="checkbox"/> | <input type="checkbox"/> | Not applicable                                                          |
| <b>Support</b>                    |    |                                                                                                                                                                                                 |                          |                          |                                                                         |
| Sources                           | 5a | Indicate sources of financial or other support for the review                                                                                                                                   | x                        | <input type="checkbox"/> | Funding, page 18                                                        |
| Sponsor                           | 5b | Provide name for the review funder and/or sponsor                                                                                                                                               | x                        | <input type="checkbox"/> | Methods, study organisation, page 6                                     |
| Role of sponsor/funder            | 5c | Describe roles of funder(s), sponsor(s), and/or institution(s), if any, in developing the protocol                                                                                              | x                        | <input type="checkbox"/> | Methods, study organisation, page 6, Authors' contributions, page 17,18 |

| Section/topic               | #   | Checklist item                                                                                                                                                                                                            | Information reported     |                          | Page number(s)                                                 |
|-----------------------------|-----|---------------------------------------------------------------------------------------------------------------------------------------------------------------------------------------------------------------------------|--------------------------|--------------------------|----------------------------------------------------------------|
|                             |     |                                                                                                                                                                                                                           | Yes                      | No                       |                                                                |
| <b>INTRODUCTION</b>         |     |                                                                                                                                                                                                                           |                          |                          |                                                                |
| <b>Rationale</b>            | 6   | Describe the rationale for the review in the context of what is already known                                                                                                                                             | x                        | <input type="checkbox"/> | Introduction, Rationale for use of oral insulin..., page 5     |
| <b>Objectives</b>           | 7   | Provide an explicit statement of the question(s) the review will address with reference to participants, interventions, comparators, and outcomes (PICO)                                                                  | x                        | <input type="checkbox"/> | Introduction, page 4-5                                         |
| <b>METHODS</b>              |     |                                                                                                                                                                                                                           |                          |                          |                                                                |
| <b>Eligibility criteria</b> | 8   | Specify the study characteristics (e.g., PICO, study design, setting, time frame) and report characteristics (e.g., years considered, language, publication status) to be used as criteria for eligibility for the review | x                        | <input type="checkbox"/> | Methods, page 6-11                                             |
| <b>Information sources</b>  | 9   | Describe all intended information sources (e.g., electronic databases, contact with study authors, trial registers, or other grey literature sources) with planned dates of coverage                                      | <input type="checkbox"/> | <input type="checkbox"/> | Not applicable                                                 |
| <b>Search strategy</b>      | 10  | Present draft of search strategy to be used for at least one electronic database, including planned limits, such that it could be repeated                                                                                | <input type="checkbox"/> | <input type="checkbox"/> | Not applicable                                                 |
| <b>STUDY RECORDS</b>        |     |                                                                                                                                                                                                                           |                          |                          |                                                                |
| Data management             | 11a | Describe the mechanism(s) that will be used to manage records and data throughout the review                                                                                                                              | x                        | <input type="checkbox"/> | eCRFs, page 9                                                  |
| Selection process           | 11b | State the process that will be used for selecting studies (e.g., two independent reviewers) through each phase of the review (i.e., screening, eligibility, and inclusion in meta-analysis)                               | <input type="checkbox"/> | <input type="checkbox"/> | Not applicable                                                 |
| Data collection process     | 11c | Describe planned method of extracting data from reports (e.g., piloting forms, done independently, in duplicate), any processes for obtaining and confirming data from investigators                                      | <input type="checkbox"/> | <input type="checkbox"/> | Not applicable                                                 |
| <b>Data items</b>           | 12  | List and define all variables for which data will be sought (e.g., PICO items, funding sources), any pre-planned data assumptions and simplifications                                                                     | x                        | <input type="checkbox"/> | Analysis, Primary outcome and analysis, Secondary outcomes and |

| Section/topic                             | #   | Checklist item                                                                                                                                                                                                                              | Information reported     |                          | Page number(s)                                                                      |
|-------------------------------------------|-----|---------------------------------------------------------------------------------------------------------------------------------------------------------------------------------------------------------------------------------------------|--------------------------|--------------------------|-------------------------------------------------------------------------------------|
|                                           |     |                                                                                                                                                                                                                                             | Yes                      | No                       |                                                                                     |
|                                           |     |                                                                                                                                                                                                                                             |                          |                          | analyses, page 11,12                                                                |
| <b>Outcomes and prioritization</b>        | 13  | List and define all outcomes for which data will be sought, including prioritization of main and additional outcomes, with rationale                                                                                                        | x                        | <input type="checkbox"/> | Analysis, Primary outcome and analysis, Secondary outcomes and analyses, page 11,12 |
| <b>Risk of bias in individual studies</b> | 14  | Describe anticipated methods for assessing risk of bias of individual studies, including whether this will be done at the outcome or study level, or both; state how this information will be used in data synthesis                        | <input type="checkbox"/> | <input type="checkbox"/> | Not applicable                                                                      |
| <b>DATA</b>                               |     |                                                                                                                                                                                                                                             |                          |                          |                                                                                     |
| <b>Synthesis</b>                          | 15a | Describe criteria under which study data will be quantitatively synthesized                                                                                                                                                                 | <input type="checkbox"/> | <input type="checkbox"/> | Not applicable                                                                      |
|                                           | 15b | If data are appropriate for quantitative synthesis, describe planned summary measures, methods of handling data, and methods of combining data from studies, including any planned exploration of consistency (e.g., $I^2$ , Kendall's tau) | <input type="checkbox"/> | <input type="checkbox"/> | Not applicable                                                                      |
|                                           | 15c | Describe any proposed additional analyses (e.g., sensitivity or subgroup analyses, meta-regression)                                                                                                                                         | x                        | <input type="checkbox"/> | Analysis, Primary outcome and analysis, Secondary outcomes and analyses, page 11,12 |
|                                           | 15d | If quantitative synthesis is not appropriate, describe the type of summary planned                                                                                                                                                          | <input type="checkbox"/> | <input type="checkbox"/> | Not applicable                                                                      |
| <b>Meta-bias(es)</b>                      | 16  | Specify any planned assessment of meta-bias(es) (e.g., publication bias across studies, selective reporting within studies)                                                                                                                 | <input type="checkbox"/> | <input type="checkbox"/> | Not applicable                                                                      |
| <b>Confidence in cumulative evidence</b>  | 17  | Describe how the strength of the body of evidence will be assessed (e.g., GRADE)                                                                                                                                                            | x                        | <input type="checkbox"/> | Study power and accrual target, page 12                                             |
