# Supplementary material for: Supplementation with Bifidobacterium longum subspecies infantis EVC001 for mitigation of type 1 diabetes autoimmunity: the GPPAD-SINT1A randomised controlled trial protocol
Source: PubMed Central journal article supplement — BMJ Open. 2021 Nov 9;11(11):e052449. doi: 10.1136/bmjopen-2021-052449 (PMC8578987; doi:10.1136/bmjopen-2021-052449), 2021-11-09
Supplement: bmjopen-2021-052449supp001.pdf [file bmjopen-2021-052449supp001.pdf]

### Supplementation with *Bifidobacteria longum* subspecies *infantis* EVC001 for mitigation of type 1 diabetes autoimmunity - The GPPAD-SINT1A randomized controlled trial protocol

Anette-Gabriele Ziegler, Stefanie Arnolds, Annika Kölln, Peter Achenbach, Reinhard Berner, Ezio Bonifacio, Kristina Casteels, Helena Elding Larsson, Melanie Gündert, Joerg Hasford, Olga Kordonouri, Markus Lundgren, Mariusz Oltarzewski, Marcin L. Pekalski, Markus Pfirrmann, Matthew D. Snape, Agnieszka Szypowska, John A. Todd and the GPPAD Study group

#### Supplementary File 1: GPPAD-SINT1A Study: Visit-schedule (Study Flow Chart)

| Visits                                                                                                                   | Intervention                              |                            |                       |                         |                        |
|--------------------------------------------------------------------------------------------------------------------------|-------------------------------------------|----------------------------|-----------------------|-------------------------|------------------------|
|                                                                                                                          | Baseline Visit<br>age 7 days - 6<br>weeks | Call<br>age<br>3month<br>s | Visit<br>age 6 months | Call<br>age 9<br>months | Visit<br>age 12 months |
| Visit window                                                                                                             | +14d                                      | - 14d                      | ± 14d                 | ± 14d                   | + 14d                  |
| Study visit                                                                                                              | 1                                         |                            | 2                     |                         | 3                      |
| Study call                                                                                                               |                                           | 1                          |                       | 2                       |                        |
| Informed consent,<br>Review Incl./Excl. Criteria                                                                         | X                                         |                            |                       |                         |                        |
| Randomization                                                                                                            | X                                         |                            |                       |                         |                        |
| Medical History                                                                                                          | X                                         |                            |                       |                         |                        |
| <b>Intervention</b>                                                                                                      |                                           |                            |                       |                         |                        |
| Dispense supplement and compliance<br>data sheet ( <i>do not administer supplement<br/>at study site, only at home</i> ) | X                                         |                            | X                     |                         |                        |
| <b>Local investigations &amp; measurements</b>                                                                           |                                           |                            |                       |                         |                        |
| Physical examination<br>(height, weight)                                                                                 | X                                         |                            | X                     |                         | X                      |
| Assessment of AEs and SAEs <sup>A</sup>                                                                                  |                                           | X                          | X                     | X                       | X                      |
| Assessment of rotavirus and MMR<br>vaccination schedule using official<br>records                                        |                                           |                            | X                     |                         | X                      |
| Blood glucose <sup>B</sup>                                                                                               |                                           |                            | X                     |                         | X                      |
| HbA1c                                                                                                                    |                                           |                            |                       |                         | X                      |
| <b>Sample collection</b>                                                                                                 |                                           |                            |                       |                         |                        |
| <200 µl capillary or venous blood for<br>glucose                                                                         |                                           |                            | X                     |                         | X                      |
| < 1ml EDTA blood for HbA1c                                                                                               |                                           |                            |                       |                         | X                      |
| 2ml blood for serum samples for central<br>antibody measurement <sup>C, D</sup>                                          |                                           |                            | X                     |                         | X                      |
| 2ml EDTA blood for plasma samples for<br>mechanistic studies<br>(inflammation, metabolomics)                             |                                           |                            | X                     |                         | X                      |
| 2 ml EDTA blood for DNA sample <sup>C</sup>                                                                              |                                           |                            |                       |                         | X                      |

|                                                                        | Intervention                              |                            |                       |                         |                        |
|------------------------------------------------------------------------|-------------------------------------------|----------------------------|-----------------------|-------------------------|------------------------|
|                                                                        | Baseline Visit<br>age 7 days - 6<br>weeks | Call<br>age<br>3month<br>s | Visit<br>age 6 months | Call<br>age 9<br>months | Visit<br>age 12 months |
| <b>Visits</b>                                                          |                                           |                            |                       |                         |                        |
| Stool sample for microbiome 16S                                        | X                                         | X                          | X                     |                         | X                      |
| Stool sample for colonization                                          |                                           | x                          |                       |                         |                        |
| Stool sample for stool pH & calprotectin<br>(in selected participants) |                                           |                            | X                     |                         |                        |

| Central measurements                                             |                                   |   |   |  |   |
|------------------------------------------------------------------|-----------------------------------|---|---|--|---|
| IAA; GADA; IA-2A; ZnT8RA; ZnT8WA                                 |                                   |   | X |  | X |
| TGA                                                              |                                   |   | X |  | X |
| Stool PCR for B. infantis colonization                           |                                   | X |   |  |   |
| Antibody responses to rotavirus vaccine                          |                                   |   | X |  |   |
| Microbiome 16s <sup>E</sup>                                      | X                                 | X |   |  | X |
| Mechanistic markers<br>(inflammation, metabolomics) <sup>E</sup> |                                   |   | X |  | X |
| Electronic questionnaires completed by families                  |                                   |   |   |  |   |
| Questionnaire about breast-feeding and antibiotics               | every 2 weeks until age 12 months |   |   |  |   |
| Questionnaire about infections and vaccinations                  | every 2 weeks until age 12 months |   |   |  |   |
| Questionnaire about allergies                                    |                                   |   |   |  | X |
| Ancillary assessments                                            |                                   |   |   |  |   |
| Whole blood FACS <sup>F</sup><br>(Dresden and Munich only)       |                                   |   | X |  | X |

<sup>A</sup> AEs/SAEs will be noted and reported as under intervention phase for 30 days after end of treatment day

<sup>B</sup> by handmeter or haemocue

<sup>C</sup> if there is left over material and a signed biobank consent, the left over serum and DNA will be stored in the IBBL or local biobank

<sup>D</sup> venous or capillary blood for the AAB confirmation sample can be obtained by a local physician

<sup>E</sup> measurements may partly be done as exploratory project after unblinding and analysis of main outcomes

<sup>F</sup> to assess maturation of immune cell composition and response

|                                                                                 | Follow-up<br>(minimum 2.5 years; maximum up to 5.5 years after end of intervention) |                      |                                                               |                                          |
|---------------------------------------------------------------------------------|-------------------------------------------------------------------------------------|----------------------|---------------------------------------------------------------|------------------------------------------|
|                                                                                 | Call<br>age 18 months                                                               | Visit<br>age 2 years | Call<br>every 12 month<br>(in the middle of<br>yearly visits) | Visit<br>every 12<br>months <sup>G</sup> |
| <b>Visits</b>                                                                   |                                                                                     |                      |                                                               |                                          |
| Visit window                                                                    | ± 30d                                                                               | ± 30d                | ± 30d                                                         | ± 30d                                    |
| Study visit                                                                     |                                                                                     | 4                    |                                                               | 5+                                       |
| Study call                                                                      | 3                                                                                   |                      | 4+                                                            |                                          |
| <b>Local investigations and measurements</b>                                    |                                                                                     |                      |                                                               |                                          |
| Physical examination<br>(height, weight)                                        |                                                                                     | X                    |                                                               | X                                        |
| Assessment of AEs and SAEs <sup>A</sup>                                         | X                                                                                   |                      |                                                               |                                          |
| Assessment of MMR vaccination schedule using<br>official records                |                                                                                     | X                    |                                                               |                                          |
| Blood glucose <sup>B</sup>                                                      |                                                                                     | X                    |                                                               | X                                        |
| <b>Sample collection</b>                                                        |                                                                                     |                      |                                                               |                                          |
| <200 µl capillary or venous blood for glucose                                   |                                                                                     | X                    |                                                               | X                                        |
| 2ml blood for serum samples for central<br>antibody measurement <sup>C, D</sup> |                                                                                     | X                    |                                                               | X                                        |
| 2ml EDTA blood for plasma samples for<br>mechanistic studies (inflammation)     |                                                                                     | X                    |                                                               |                                          |
| <b>Central measurements</b>                                                     |                                                                                     |                      |                                                               |                                          |
| IAA; GADA; IA-2A; ZnT8RA; ZnT8WA                                                |                                                                                     | X                    |                                                               | X                                        |
| TGA                                                                             |                                                                                     | X                    |                                                               | X                                        |
| Antibody Responses to MMR vaccine                                               |                                                                                     | X                    |                                                               |                                          |
| Mechanistic markers (inflammation) <sup>E</sup>                                 |                                                                                     | X                    |                                                               |                                          |
| <b>Electronic questionnaires completed by families</b>                          |                                                                                     |                      |                                                               |                                          |
| Questionnaire about allergies                                                   | every 12 months until end of study                                                  |                      |                                                               |                                          |
| <b>Ancillary assessments</b>                                                    |                                                                                     |                      |                                                               |                                          |
| Whole blood FACS ( <i>Dresden and Munich only</i> )                             |                                                                                     | X                    |                                                               |                                          |

<sup>A</sup> AEs/SAEs will be noted and reported as under intervention phase for 30 days after end of treatment day

<sup>B</sup> by handmeter or haemocue

<sup>C</sup> if there is left over material and a signed biobank consent, the left over serum and DNA will be stored in the IBBL or local biobank

<sup>D</sup> venous or capillary blood for the AAB confirmation sample can be obtained by a local physician

<sup>E</sup> measurements may partly be done as exploratory project after unblinding and analysis of main outcomes

<sup>F</sup> to assess maturation of immune cell composition and response

<sup>G</sup> Final visit must be performed within the last 6 months before last enrolled child completed 2.5 years of follow-up
